1 **Assembly and validation of conserved long non-coding RNAs in the ruminant**  
2 **transcriptome**

3

4 Stephen J. Bush<sup>1,2</sup>, Charity Muriuki<sup>1</sup>, Mary E. B. McCulloch<sup>1</sup>, Iseabail L. Farquhar<sup>3</sup>, Emily  
5 L. Clark<sup>1\*</sup>, David A. Hume<sup>1,4\*†</sup>

6

7 <sup>1</sup> The Roslin Institute, University of Edinburgh, Easter Bush Campus, Edinburgh, Midlothian,  
8 EH25 9RG

9 <sup>2</sup> Experimental Medicine Division, Nuffield Department of Clinical Medicine, University of  
10 Oxford, John Radcliffe Hospital, Headington, Oxford, OX3 9DU

11 <sup>3</sup> Centre for Synthetic and Systems Biology, CH Waddington Building, Max Borne Crescent,  
12 King's Buildings, University of Edinburgh, EH9 3BF

13 <sup>4</sup> Mater Research-University of Queensland, Translational Research Institute, 37 Kent Street,  
14 Woolloongabba, Queensland 4102, Australia

15 \* These authors contributed equally to this work.

16 † Corresponding author: david.hume@roslin.ed.ac.uk / david.hume@uq.edu.au

17

18 Email addresses:

19 Stephen J. Bush                      stephen.bush@ndm.ox.ac.uk / stephen.bush@roslin.ed.ac.uk

20 Charity Muriuki                      charity.muriuki@ed.ac.uk

21 Mary E. B. McCulloch              mary.mcculloch@ed.ac.uk

- 22 Iseabail L. Farquhar      iseabail.farquhar@ed.ac.uk
- 23 Emily L. Clark            emily.clark@roslin.ed.ac.uk
- 24 David A. Hume            david.hume@uq.edu.au / david.hume@roslin.ed.ac.uk
- 25

26 **Abstract**

27

28 mRNA-like long non-coding RNAs (lncRNA) are a significant component of mammalian  
29 transcriptomes, although most are expressed only at low levels, with high tissue-specificity  
30 and/or at specific developmental stages. In many cases, therefore, lncRNA detection by  
31 RNA-sequencing (RNA-seq) is compromised by stochastic sampling. To account for this and  
32 create a catalogue of ruminant lncRNA, we compared *de novo* assembled lncRNA derived  
33 from large RNA-seq datasets in transcriptional atlas projects for sheep and goats with  
34 previous lncRNA assembled in cattle and human. Few lncRNA could be reproducibly  
35 assembled from a single dataset, even with deep sequencing of the same tissues from multiple  
36 animals. Furthermore, there was little sequence overlap between lncRNA assembled from  
37 pooled RNA-seq data. We combined positional conservation (synteny) with cross-species  
38 mapping of candidate lncRNA to identify a consensus set of ruminant lncRNA and then used  
39 the RNA-seq data to demonstrate detectable and reproducible expression in each species. The  
40 majority of lncRNA were encoded by single exons, and expressed at < 1 TPM. In sheep, 20-  
41 30% of lncRNA had expression profiles significantly correlated with neighbouring protein-  
42 coding genes, suggesting association with enhancers. Alongside substantially expanding the  
43 ruminant lncRNA repertoire, the outcomes of our analysis demonstrate that stochastic  
44 sampling can be partly overcome by combining RNA-seq datasets from related species. This  
45 has practical implications for the future discovery of lncRNA in other species.

46

47 **Introduction**

48

49 Mammalian transcriptomes include many long non-coding RNAs (lncRNAs), a collective  
50 term for transcripts of > 200 nucleotides that resemble mRNAs (many being 3'  
51 polyadenylated, 5' capped and spliced) but do not encode a protein product [1]. Proposed  
52 functional roles of lncRNAs include transcriptional regulation, epigenetic regulation,  
53 intracellular trafficking and chromatin remodelling (see reviews [2-9]). Some view lncRNAs  
54 as transcriptional noise [10, 11]. Full length lncRNAs are difficult to assemble: many are  
55 expressed at low levels [12], with high tissue-specificity [13, 14], at specific developmental  
56 time points (e.g. [15-17]), and with few signs of selective constraint [18, 19]. Many are also  
57 expressed transiently, and so may be partly degraded by the exosome complex [20].  
58 The initial recognition of lncRNAs as widespread and *bona fide* outputs of mammalian  
59 transcription was based upon the isolation and sequencing of large numbers of mouse and  
60 human full-length cDNAs [21-23], many of which were experimentally validated [24] and  
61 shown to participate in sense-antisense pairs [25]. They were captured in significant numbers  
62 because the cDNA libraries were subtracted to remove abundant transcripts. More recent  
63 studies have used RNA-sequencing (RNA-seq) to assemble larger catalogues of lncRNAs  
64 [26]. Because of the power-law relationship of individual transcript abundance in mammalian  
65 transcriptomes [27], unless sequencing is carried out at massive depth, the exons of lowly-  
66 abundant transcripts (such as lncRNAs) are subject to stochastic sampling and are detected  
67 inconsistently between technical replicates of the same sample [28]. RNA-seq is also a  
68 relatively inaccurate means of reconstructing the 5' ends of transcripts [29]. To overcome this  
69 constraint, the FANTOM Consortium supplemented RNA-seq with Cap Analysis of Gene  
70 Expression (CAGE) data, characterising – in humans – a 5'-complete lncRNA transcriptome  
71 [30].

72 RNA-seq libraries from multiple tissues, cell types and developmental stages are commonly  
73 pooled to maximise the number of lncRNA gene models assembled. Genome-wide surveys  
74 have expanded the lncRNA repertoire of livestock species such as cattle (18 tissues,  
75 sequenced at approx. 40-100 million reads each) [31], pig (10 tissues, sequenced at approx. 6-  
76 40 million reads each) [32], and horse (8 tissues, sequenced at approx. 20-200 million reads  
77 each) [33], complementing tissue-specific lncRNA catalogues of, for example, cattle muscle  
78 [34, 35] and skin [36], and pig adipose [37, 38], liver [39] and testis [40].  
79 The low level of lncRNA conservation (at some loci, it appears that only the act of  
80 transcription, rather than the transcript sequence itself, is functionally relevant [41]) reduces  
81 the utility of comparative analysis of the large RNA-seq datasets available from human [30,  
82 42] and mouse [43]. Amongst 200 human and mouse lncRNAs, each characteristic of specific  
83 immune cell types, there was <1% sequence conservation [44].  
84 Here we focus on more closely related species. We have generated atlases of gene expression  
85 for the domestic sheep, *Ovis aries* [45], and the goat, *Capra hircus* (manuscript in  
86 preparation). As the two species are closely related (sharing a common ancestor < 10mya  
87 [46]) and their respective RNA-seq datasets contain many of the same tissues, it is possible to  
88 use data from one species to infer the presence of lncRNAs in the other. Cattle and humans  
89 are more distantly related to small ruminants, but nevertheless are substantially more similar  
90 than mice. We extend our approach by utilising existing human and cattle lncRNA datasets to  
91 identify a consensus ruminant lncRNA transcriptome, and use the sheep transcriptional atlas  
92 to confirm that candidate lncRNA identified by cross-species inference are reproducibly  
93 expressed. The lncRNA catalogues we have generated in the sheep and goat are of interest in  
94 themselves [47] and contribute valuable information to the Functional Annotation of Animal  
95 Genomes (FAANG) project [48, 49].

96

## 97 **Results and Discussion**

98

### 99 ***Identifying lncRNAs in the sheep and goat transcriptomes***

100 We have previously created an expression atlas for the domestic sheep [45], using both  
101 polyadenylated and rRNA-depleted RNA-seq data collected primarily from three male and  
102 three female adult Texel x Scottish Blackface (TxBF) sheep at two years of age: 441 RNA-  
103 seq libraries in total, comprising 5 cell types and multiple tissues spanning all major organ  
104 systems and several developmental stages, from embryonic to adult. To complement this  
105 dataset, we also created a smaller-scale expression atlas – of 54 mRNA-seq libraries – from 6  
106 day old crossbred goats, which will be the subject of a dedicated analysis. For both species,  
107 each RNA-seq library was aligned against its reference genome (Oar v3.1 and ARS1, for  
108 sheep and goat, respectively) using HISAT2 [50], with transcripts assembled using StringTie  
109 [51]. This pipeline produced a non-redundant set of *de novo* gene and transcript models, as  
110 previously described [45], and expanded the set of transcripts in each reference genome to  
111 include *ab initio* lncRNA predictions and novel protein-coding genes. As the primary purpose  
112 of the sheep expression atlas was to improve the functional characterisation of the protein-  
113 coding transcriptome, the novel sheep protein-coding transcript models generated by this  
114 pipeline have been previously discussed [45] (novel protein-coding transcripts for goats will  
115 be discussed in a dedicated analysis of the protein-coding goat transcriptome).

116 Using similar filter criteria to a previous study [52], the *de novo* gene models were parsed to  
117 create longlists of 30,677 (sheep) and 7671 (goat) candidate lncRNAs, each of which was  $\geq$   
118 200bp and was not associated, on the same strand, with a known protein-coding locus. The 4-  
119 fold difference in the length of each longlist can be attributed to the relative size of each  
120 dataset. The sheep atlas contains 8 times as many RNA-seq libraries, spans multiple  
121 developmental stages (from embryonic to adult), and has a subset of its samples specifically

122 prepared to ensure the comprehensive capture of ncRNAs – unlike any sample in the goat  
123 dataset, this subset is sequenced at a 4-fold higher depth (>100 million reads, rather than >25  
124 million reads) using a total RNA-seq, rather than mRNA-seq, protocol.

125 Each model on both longlists was assessed for coding potential using the classification tools  
126 CPC [53], CPAT [54] and PLEK [55], alongside homology searches of its longest ORF –  
127 with blastp [56] and HMMER [57] – to known protein and domain sequences (within the  
128 Swiss-Prot [58, 59] and Pfam-A [60] databases, respectively). Those gene models classified  
129 as non-coding by CPC, CPAT and PLEK, and having no detectable blastp and HMMER hits,  
130 are considered novel lncRNAs.

131 This pipeline creates shortlists of 12,296 (sheep) and 2657 (goat) lncRNAs (Tables S1 and  
132 S2, respectively), representing approximately 40% (sheep) and 35% (goat) of the gene  
133 models on each longlist. The mean gene length is similar in both shortlists – 6.7kb (sheep)  
134 and 8.8kb (goat) – as is summed exon length, averaging 1.2kb in each species.

135 Consistent with previous analysis in several other species [31, 61], 6956 (57%) of the sheep  
136 lncRNAs, and 1284 (48%) of the goat, were single-exonic. For sheep, the shortlist contains  
137 11,646 previously unknown lncRNA models and provides additional evidence for 650  
138 existing Oar v3.1 lncRNA models (Table S1). A small proportion of longlisted gene models  
139 were considered non-coding by at least one of CPC, CPAT or PLEK, but nevertheless  
140 showed some degree of sequence homology to either a known protein or protein domain: for  
141 sheep, 226 (including 13 existing Oar v3.1 models) (Table S3), and for goats, 153 (Table S4).

142 The number of novel lncRNAs identified is also given per chromosome (Tables S5 (sheep)  
143 and S6 (goat)) and per type (Tables S7 (sheep) and S8 (goat)), the majority of which – in both  
144 species – are found in intergenic regions, 10-100kb from the nearest gene. Overall, these  
145 lncRNA models increase the number of possible genes in the reference annotation by  
146 approximately 30% (sheep) and 12% (goat).

147 ***The sets of ab initio sheep and goat lncRNAs only minimally overlap at the sequence level***

148 Even with full length cDNA sequences, comparative analysis revealed that only 27% of the  
149 lncRNAs identified in human had mouse counterparts [23]. When comparing the sets of  
150 sheep and goat lncRNAs, few predicted transcripts – in either species – show sequence-level  
151 similarity either to each other or to other closely or distantly related species (cattle and  
152 human, respectively, which shared a common ancestor with sheep and goats approx. 25 and  
153 95mya [46]). Of the 12,296 shortlisted sheep lncRNAs, less than half (n = 5139, i.e. 42%)  
154 had any detectable pairwise alignment – of any quality and of any length – to either the  
155 shortlisted goat lncRNAs, a set of 9778 cattle lncRNAs from a previous study [31] or two  
156 sets of human lncRNAs (Figure 1 and Table S9). In only a small proportion of these  
157 alignments can there be high confidence: that is, the alignment has a % identity  $\geq 50\%$   
158 within an alignment  $\geq 50\%$  the length of the target sequence. Of the 5139 sheep lncRNAs  
159 that could be aligned to any species, only 293 (5.7%) could be aligned with high confidence  
160 to goat and 265 (5.2%) to cattle transcripts. Similarly, of the sheep lncRNAs that could be  
161 aligned to either of two human lncRNA databases – NONCODE [62] and lncRNAdb [63] –  
162 68 (1.6% of the total alignable lncRNAs) aligned with high confidence to the NONCODE  
163 database, and none to the lncRNAdb. Similar findings are observed with the 2657 shortlisted  
164 goat lncRNAs: 1343 (50.5%) had a detectable pairwise alignment, of any quality, to either set  
165 of sheep, cattle or human lncRNAs. However, of these 1343 lncRNAs, only 113 (8.4%)  
166 aligned with high confidence to sheep, 88 (6.6%) to cattle, 55 (4.1%) to the human  
167 NONCODE database, and 1 (0.1%) to the human lncRNAdb database (Figure 1 and Table  
168 S10). These observations allow for two possibilities. Firstly, lncRNAs may, in general, be  
169 poorly conserved at the sequence level, consistent with previous findings [18, 19] and the  
170 observation that only 6% of the sheep/goat alignments have  $>50\%$  reciprocal identity.



171 However, an alternative is that despite the apparent depth of coverage, we have only  
172 assembled a subset of the total lncRNA transcriptome in each species.

173

174 ***lncRNAs not captured by the RNA-seq libraries of one species can be found using data***  
175 ***from a related species***

176 A reasonable *a priori* prediction is that lncRNAs – if functionally relevant – are most likely  
177 to share expression in a closely related species. Whereas human and mouse lncRNAs  
178 identified as full length cDNAs were generally less conserved between species than the 5'  
179 and 3'UTRs of protein-coding transcripts, their promoters were more highly conserved than  
180 those of protein-coding transcripts, some extending as far as chicken [43, 64]. These findings  
181 suggested that the large majority of lncRNAs that were analyzed displayed positional  
182 conservation across species. Accordingly, rather than comparing the similarity of two sets of  
183 lncRNA transcripts, we mapped the lncRNAs assembled in one species (e.g. sheep) to the  
184 genome of another (e.g. goat), deriving confidence in the mapping location from synteny.  
185 For each of the pairwise sheep/cattle, sheep/goat, cattle/goat, sheep/human, goat/human, and  
186 cattle/human comparisons, we identified sets of syntenic blocks: regions in the genome where  
187 gene order is conserved both up- and downstream of a focal gene (see Table 1 and Methods).  
188 In the sheep/cattle comparison, approximately 5% of the syntenic blocks contain at least one  
189 lncRNA with a relative position conserved in both species, either upstream (n=139 lncRNAs)  
190 or downstream (n=141) of the central gene in each block (Table S11). In the sheep/goat and  
191 cattle/goat comparisons, respectively, approximately 2 and 3% of the syntenic blocks contain  
192 a lncRNA (for sheep/goat, n=42 upstream, 40 downstream; for cattle/goat, 86 upstream, 83  
193 downstream) (Tables S12 and S13, respectively). With increased species divergence, far  
194 fewer lncRNAs (<1%) have relative positions conserved in either the upstream or  
195 downstream positions of the sheep/human, goat/human and cattle/human syntenic blocks

196 (Tables S14, S15 and S16, respectively). These comparatively small proportions highlight the  
197 minimal overlap between each set of assembled transcripts, consistent with stochastic  
198 assembly – lncRNAs expected to be present in a particular location are captured in only one  
199 species, not both. As such, very few lncRNAs in either of the sheep, goat and cattle subsets  
200 have evidence of both shared sequence homology and conserved synteny. When comparing  
201 sheep and cattle, 16 unique lncRNAs have high-confidence pairwise alignments within a  
202 region of conserved synteny, and when comparing sheep and goat, 6 (Table S17).

203 In most of the syntenic blocks examined, if a lncRNA was detected in one location in one  
204 species (either up- or downstream of a focal gene), no corresponding assembled lncRNA was  
205 annotated in the comparison species, even though both species sequenced a similar range of  
206 tissues. For example, of the 2927 syntenic blocks in the sheep/cattle comparison, 347 (12%)  
207 of the sheep blocks, and 506 (17%) of the cattle blocks, contain a lncRNA in the ‘upstream’  
208 position (that is, between genes 1 and 2), with little overlap between the two species: in only  
209 139 blocks (5%) is a lncRNA present in this position in both species (Table S11). Similar  
210 results are found if considering the ‘downstream’ position, as well as the sheep/goat,  
211 goat/cattle, sheep/human, goat/human and cattle/human comparisons: approximately 2-5  
212 times as many lncRNAs are found in either of the two species than are found in both (Tables  
213 S11, S12, S13, S14, S15 and S16).

214 Each set of syntenic blocks, by definition, represents a set of conserved intergenic regions.  
215 Given that the majority of lncRNAs are intergenic (Tables S7 and S8), these regions are  
216 reasonable locations for directly mapping candidate transcripts (strictly speaking,  
217 concatenated exon sequences) to the genome. For the syntenic blocks in each species  
218 comparison, we made global alignments of the lncRNAs in species *x* to the intergenic region  
219 of species *y*, and vice versa (see Methods). Retaining only those alignments in which the  
220 lncRNA can match the intergenic region with 20 or more consecutive residues (the majority

221 of these alignments in any case have  $\geq 75\%$  identity across their entire length), we predicted  
222 1077 additional lncRNAs in cattle, 1401 in sheep, and 1735 in goat, although only 44 in  
223 human (Table 2 and Table S18). That comparatively few ruminant lncRNAs are recognisable  
224 at the sequence level in humans (and vice versa) is consistent with the rapid turnover of the  
225 lncRNA repertoire between species [65]. In the case of the goat, the number of new lncRNAs  
226 predicted by this approach is  $> 50\%$  the number captured (and shortlisted) using goat-specific  
227 RNA-seq (Figure 2). This suggests that for the purposes of lncRNA detection, datasets from  
228 related species can help overcome limitations of sequencing breadth and depth. This is even  
229 apparent with comparatively large datasets – the sheep RNA-seq, for instance, spans more  
230 tissues and developmental stages than goat, but in absolute terms, it still fails to generate  
231 assemblies of many lncRNAs.

232

233 ***Many of the sheep lncRNAs inferred by synteny – which could not be fully assembled from***  
234 ***the RNA-seq reads – are nevertheless detectably expressed***

235 To determine the expression level of the sheep lncRNAs, we utilised a subset of 71 high-  
236 depth ( $>100$  million reads) RNA-seq libraries from the sheep expression atlas [45]. This  
237 subset constitutes a set of 11 transcriptionally rich tissues (bicep muscle, hippocampus,  
238 ileum, kidney medulla, left ventricle, liver, ovary, reticulum, spleen, testes, thymus), plus one  
239 cell type in two conditions (bone marrow derived macrophages, unstimulated and 7 hours  
240 after stimulation with lipopolysaccharide), each of which was sequenced in up to 6 individuals  
241 (where possible, 3 adult males and 3 adult females).

242 For each sample, expression was quantified – as transcripts per million (TPM) – using the  
243 quantification tool Kallisto [66]. Kallisto quantifies expression by matching k-mers from the  
244 RNA-seq reads to a pre-built index of k-mers, derived from a set of reference transcripts. For  
245 sheep, we supplemented the complete set of Oar v3.1 reference transcripts ( $n=28,828$

246 transcripts, representing 26,764 genes) both with the shortlist of 11,646 novel lncRNAs (each  
247 of which is a single-transcript gene model) (Table S1), and those lncRNAs assembled from  
248 either human, goat and cattle (respectively, 18, 164 and 1219 lncRNAs), whose presence was  
249 predicted in sheep by mapping the transcript to a conserved genomic region (Table S18).  
250 Of these 13,047 novel lncRNAs, 8826 were detected at a level of TPM > 1 in at least one of  
251 the 71 adult samples, including 14 of the human transcripts (78%), 128 of the goat transcripts  
252 (78%), and 772 of the cattle transcripts (63%) (Table S19). At a depth of coverage of 100  
253 million reads, we would expect to detect transcripts reproducibly at between 0.01 and 0.1  
254 TPM if they are expressed in all libraries derived from the same tissue/cell type. Indeed, of  
255 the 13,047 total novel lncRNAs, 5353 (41%) were detected with at least one paired-end read  
256 in all 6 replicates of the tissue in which it is most highly expressed (Table S19). Those  
257 lncRNAs derived from goat and cattle transcripts are similarly reproducible: 83 (51%) of the  
258 goat transcripts were detected with at least one paired-end read in all 6 replicates of its most  
259 expressed tissue, as were 570 (47%) of the cattle transcripts, and 7 (39%) of the human  
260 transcripts (Table S19).

261 By extension, we can consider sheep, cattle and human lncRNA to be goat lncRNA, and  
262 create a Kallisto index containing candidate lncRNAs extracted from the goat genome after  
263 mapping sheep and cattle transcripts. Using such a Kallisto index (which contains the 2657  
264 shortlisted goat lncRNAs (Table S2), 507 sheep lncRNAs, 1213 cattle lncRNAs, and 15  
265 human lncRNAs), 1478 (34%) of a total set of 4392 candidate goat lncRNAs were  
266 reproducibly detected (> 0.01 TPM) in all 4 of the goats sampled (Table S20). Hence, data  
267 from the sheep expression atlas can be used to provide additional functional annotation of the  
268 goat genome, despite the much lower number of tissue samples relative to sheep.

269 In general, lncRNA expression is low: 12,325 sheep lncRNAs (94% of the total) have a mean  
270 TPM, across all 71 samples, below 10. The mean and median maximum TPM for each

271 lncRNA across the total sheep dataset was 18.4 and 2.2 TPM, respectively (Table S19). Other  
272 reports have described pervasive, but low-level, mammalian lncRNA transcription [12], and –  
273 given the mean TPM exceeds the median – a high degree of lncRNA tissue-specificity [67-  
274 69]. Indeed, for those lncRNAs detected at > 1 TPM, the average value of *tau* – a scalar  
275 measure of expression breadth bound between 0 (for housekeeping genes) and 1 (for genes  
276 expressed in one sample only) [70] (see Methods) – is 0.66. Although most of the lncRNAs  
277 (n = 4972, 64% of the 7809 lncRNAs with average TPM > 1 in at least one tissue) have  
278 idiosyncratic ‘mixed expression’ profiles (see Methods), 1339 lncRNAs (17%) are  
279 nevertheless detected at an average TPM > 1 in all 13 tissues (Table S19). Many are enriched  
280 in specific tissues, with 904 (12%) lncRNAs exhibiting a testes-specific expression pattern,  
281 consistent with a previous study identifying numerous lncRNAs involved in ovine testicular  
282 development and spermatogenesis [71].

283

#### 284 ***Few lncRNAs are fully captured by biological replicates of the same RNA-seq library***

285 In the largest assembly of predicted lncRNAs, from humans, the transfrags (transcript  
286 fragments) assembled from 7256 RNA-seq libraries were consolidated into 58,648 candidate  
287 lncRNAs [72]. Before assembling transfrags, machine learning methods were employed to  
288 filter, from each library, any library-specific background noise (genomic DNA contamination  
289 and incompletely processed RNA). Filtered libraries were then merged before assembling the  
290 final gene models, in effect pooling together transfrags (which may be partial or full-length  
291 transcripts) from all possible libraries. Consequently, a given set of transfrags can be  
292 assembled into a consensus transcript for a lncRNA, but that consensus transcript might not  
293 actually exist in any one cellular source. The only unequivocal means to confirm the full  
294 length expression would be to clone the full length cDNA. However, additional confidence  
295 can be obtained by increasing the depth of coverage in the same tissue/cell type in a technical

296 replicate. In the sheep expression atlas, 31 diverse tissues/cell types were sampled in each of  
297 6 individual adults (3 females, 3 males, all unrelated virgin animals approximately 2 years of  
298 age). By taking a subset of 31 common tissues per individual, each of the 6 adults was  
299 represented by ~0.75 billion reads.

300 In a typical lncRNA assembly pipeline, read alignments from all individuals are merged, to  
301 maximise the number of candidate gene models (using, for instance, StringTie --merge; see  
302 Methods). With  $n = 6$  adults (and ~0.75 billion reads per adult), there are  $2^n - 1 = 63$  possible  
303 combinations of data for which GTFs can be made with StringTie --merge. The  
304 reproducibility of each shortlisted lncRNA, in terms of the number of GTFs it is  
305 reconstructed in, is shown in Table S21. The GTFs themselves are available as Dataset S1  
306 (available via the University of Edinburgh DataShare portal;  
307 <http://dx.doi.org/10.7488/ds/2284>).

308 Only 812 of the 12,296 sheep lncRNAs (6.6%) could be fully reconstructed by any of the  
309 63 GTF combinations (Table S21). One caveat in this assessment is that these sheep libraries  
310 are exclusively from adults. Many of the 12,296 lncRNA models may instead be expressed  
311 during embryonic development. There is evidence of extensive embryonic lncRNA  
312 expression in human [15, 73] and mouse [16, 74]. The lack of embryonic tissues could also  
313 explain why fewer lncRNAs were assembled in goat. Nevertheless, when considering all 429  
314 RNA-seq libraries in the sheep expression atlas (i.e. including non-adult samples), there are  
315 only, on average, 29 libraries (7%) in which any individual lncRNA can be fully  
316 reconstructed (Figure 3 and Table S22).

317 In many cases, full-length sheep lncRNAs cannot be reconstructed using all reads sequenced  
318 from a given individual. For instance, the known lncRNA ENSOARG00000025201 is  
319 reconstructed by 28 of the 63 possible GTFs, but none of these GTFs was built using reads

320 from only one individual (Table S21). Only 189 lncRNAs (1.5%) were fully reconstructed in  
321 all 63 possible GTFs. Notably, 154 of these are known Ensembl lncRNAs (Table S21).

322

### 323 *lncRNAs are enriched in the vicinity of co-expressed protein-coding genes*

324 Enhancer sequences positively modulate the transcription of nearby genes (see reviews [75,  
325 76]), and may be the evolutionary origin of a fraction of these lncRNAs (as suggested by [77,  
326 78]), including a novel class of enhancer-transcribed ncRNAs, enhancer (eRNAs), which –  
327 although a distinct subset – are arbitrarily classified as lncRNAs [79]. eRNAs are likely to be  
328 co-expressed with protein-coding genes in their immediate genomic vicinity.

329 To identify co-regulated sets of protein-coding and non-coding loci, we performed network  
330 cluster analysis of the sheep expression level dataset (Table S19) using the Markov clustering  
331 (MCL) algorithm [80], as implemented by Graphia Professional (Kajeka Ltd., Edinburgh,  
332 UK) (see Methods) [81, 82]. To reduce noise, only those novel lncRNAs with reproducible  
333 expression (that is, having  $> 0.01$  TPM in every replicate of the tissue in which it is most  
334 highly expressed) are included in this analysis ( $n = 5353$ ). The resulting graph contained only  
335 genes with tightly correlated expression profiles (Pearson's  $r \geq 0.95$ ) (Figure 4) and was  
336 highly structured, organised into clusters of genes with a tissue or cell-type specific  
337 expression profile (Table S23).

338 We expect that for a given cluster of co-expressed genes (which contains  $x$  lncRNAs and  $y$   
339 protein-coding genes, each on chromosome  $z$ ), the distance between an enhancer-derived  
340 lncRNA and the nearest protein-coding gene should be significantly shorter than the distance  
341 between that lncRNA and a random subset of protein-coding genes. For the purposes of this  
342 test, each random subset, of size  $y$ , is drawn from the complete set of protein-coding genes on  
343 the same chromosome  $z$  (that is, the same chromosome as the lncRNA), irrespective of strand

344 and their degree of co-expression with the lncRNA. The significance of any difference in  
345 distance was then assessed using a randomisation test (see Methods).

346 Of the 5353 lncRNAs included in the analysis, 1351 (25%) were found on the same  
347 chromosome as a highly co-expressed protein-coding gene (Table S24), with 252 of these  
348 (19%) significantly closer to the co-expressed gene than to randomly selected genes from the  
349 same chromosome ( $p < 0.05$ ; Table S25).

350 Even where the lncRNA is reproducibly expressed in each of 6 animals, there is still  
351 substantial noise in the expression estimates with compromises co-expression analysis. We  
352 therefore calculated the Pearson's  $r$  between the expression profile of each reproducibly  
353 expressed lncRNA and its nearest protein-coding gene (which may overlap it), located both  
354 5' and 3' on the sheep genome (Table S26). The distance to the nearest gene correlates  
355 negatively with the absolute value of Pearson's  $r$ , both for genes upstream ( $\rho = -0.19$ ,  $p <$   
356  $2.2 \times 10^{-16}$ ) and downstream ( $\rho = -0.21$ ,  $p < 2.2 \times 10^{-16}$ ) of the lncRNA (Table S26). This  
357 suggests that, in general, the expression profile of a lncRNA is more similar to nearer than  
358 more distant protein-coding genes. Using a variant of the above randomisation test, we also  
359 tested whether the absolute value of Pearson's  $r$ , when correlating the expression profiles of  
360 the lncRNA and its nearest protein-coding gene, was significantly greater than the value of  $r$   
361 obtained when correlating the lncRNA with 1000 random protein-coding genes drawn from  
362 the same chromosome. For this test, analysis was restricted to those lncRNAs on complete  
363 chromosomes rather than the smaller unplaced scaffolds. 27% of lncRNA had a Pearson  
364 correlation of  $> 0.5$  with either the nearest upstream or downstream gene, and in around 20%  
365 of cases, correlation was significantly different ( $p < 0.05$ ) from the average correlation with  
366 the random set (Table S26).

367

368



369 **Conclusion**

370

371 Comparative analysis of lncRNAs assembled using RNA-seq data from several closely  
372 related species – sheep, goat and cattle – demonstrates that for the *de novo* assembly of  
373 lncRNAs requires very high-depth RNA-seq datasets with a large number of replicates (> 6  
374 replicates per sample, each sequencing >> 100 million reads). The transcription of many  
375 lncRNAs identified by this cross-species approach is conserved, effectively validating their  
376 existence. We identified a subset of lncRNAs in close proximity to protein-coding genes with  
377 which they are strongly co-expressed, consistent with the evolutionary origin of some  
378 ncRNAs in enhancer sequences. Conversely, the majority of lncRNA do not share  
379 transcriptional regulation with neighbouring protein-coding genes. Overall, alongside  
380 substantially expanding the lncRNA repertoire for several livestock species, we demonstrate  
381 that the conventional approach to lncRNA detection – that is, species-specific *de novo*  
382 assembly – can be reliably supplemented by data from related species.

383

384 **Materials and Methods**

385

386 ***Sheep RNA-sequencing data***

387 We have previously created an expression atlas for the domestic sheep [45], using RNA-seq  
388 data largely collected from adult Texel x Scottish Blackface (TxBF) sheep. Experimental  
389 protocols for tissue collection, cell isolation, RNA extraction, library preparation, RNA  
390 sequencing and quality control are as previously described [45], and independently available  
391 on the FAANG Consortium website (<http://ftp.faang.ebi.ac.uk/ftp/protocols>). All RNA-seq  
392 libraries were prepared by Edinburgh Genomics (Edinburgh Genomics, Edinburgh, UK) and  
393 sequenced using the Illumina HiSeq 2500 sequencing platform (Illumina, San Diego, USA).

394 The majority of these libraries were sequenced to a depth of >25 million paired-end reads per  
395 sample using the Illumina TruSeq mRNA library preparation protocol (polyA-selected)  
396 (Illumina; Part: 15031047, Revision E). A subset of 11 transcriptionally rich ‘core’ tissues  
397 (bicep muscle, hippocampus, ileum, kidney medulla, left ventricle, liver, ovary, reticulum,  
398 spleen, testes, thymus), plus one cell type in two conditions (bone marrow derived  
399 macrophages (BMDMs), unstimulated and 7 hours after stimulation with lipopolysaccharide  
400 (LPS)), were sequenced to a depth of >100 million paired-end reads per sample using the  
401 Illumina TruSeq total RNA library preparation protocol (rRNA-depleted) (Illumina; Part:  
402 15031048, Revision E).  
403 Sample metadata for all tissue and cell samples are deposited in the EBI BioSamples database  
404 under submission identifier GSB-718  
405 (<https://www.ebi.ac.uk/biosamples/groups/SAMEG317052>). The raw read data, as .fastq  
406 files, are deposited in the European Nucleotide Archive (ENA) under study accession  
407 PRJEB19199 (<http://www.ebi.ac.uk/ena/data/view/PRJEB19199>).

408

#### 409 ***Goat RNA-sequencing data***

410 All RNA-seq libraries for goat were prepared by Edinburgh Genomics (Edinburgh Genomics,  
411 Edinburgh, UK) (as above) and sequenced using the Illumina HiSeq 4000 sequencing  
412 platform (Illumina, San Diego, USA). These libraries were sequenced to a depth of >30  
413 million paired-end reads per sample using the Illumina TruSeq mRNA library preparation  
414 protocol (polyA-selected) (Illumina; Part: 15031047, Revision E). Sample metadata for all  
415 tissue and cell samples are deposited in the EBI BioSamples database under submission  
416 identifier GSB-2131 (<https://www.ebi.ac.uk/biosamples/groups/SAMEG330351>). The raw  
417 read data, as .fastq files, are deposited in the ENA under study accession PRJEB23196  
418 (<http://www.ebi.ac.uk/ena/data/view/PRJEB23196>).

#### 419 ***Identifying candidate lncRNAs in sheep and goats***

420 We have previously described an RNA-seq processing pipeline for sheep [45] – using the  
421 HISAT2 aligner [50] and StringTie assembler [51] – for generating a uniform, non-redundant  
422 set of *de novo* assembled transcripts. The same pipeline is applied to the goat RNA-seq data.  
423 This pipeline culminates in a single file per species, merged.gtf; that is, the output of  
424 StringTie --merge, which collates every transcript model from the 54 goat assemblies (each  
425 assembly being both individual- and tissue-specific), and 429 of the 441 assemblies within  
426 the sheep expression atlas [45] (12 sheep libraries were not used for this purpose as they were  
427 replicates of pre-existing bone marrow-derived macrophage libraries, prepared using an  
428 mRNA-seq rather than a total RNA-seq protocol). Not all transcript models in either GTF  
429 will be stranded. This is because HISAT2 infers the transcription strand of a given transcript  
430 by reference to its splice sites; this is not possible for single exon transcripts, which are un-  
431 spliced.

432 The GTF was parsed to distinguish candidate lncRNAs from assembly artefacts, and from  
433 other RNAs, by applying the filter criteria of Ilott, *et al.* [52], excluding gene models that (a)  
434 were < 200bp in length, (b) overlapped (by  $\geq$  1bp on the same strand) any coordinates  
435 annotated as ‘protein-coding’ or ‘pseudogene’ (this classifications are explicitly stated in the  
436 Ensembl-hosted Oar v3.1 annotation and assumed true of all gene models in the ARS1  
437 annotation), or (c) were associated with multiple transcript models (which are more likely to  
438 be spurious). For single-exon gene models, we used a more conservative length threshold of  
439 500bp – the lower threshold of 200bp could otherwise be met by a single pair of reads. We  
440 further excluded any novel gene model that was previously considered protein-coding in each  
441 species’ expression atlas (as described in [45]); these models contain an ORF encoding a  
442 peptide homologous to a ruminant protein in the NCBI nr database [45]. These criteria  
443 establish longlists of 30,677 candidate sheep lncRNAs (14,862 of which are multi-exonic)

444 and 7671 candidate goat lncRNAs (3289 of which are multi-exonic). The sheep genome, Oar  
445 v3.1, already contains 1858 lncRNA models, of which the StringTie assembly precisely  
446 reconstructs 1402 (75%). Despite this pre-existing support, these models were included on  
447 the sheep longlist for independent verification. The goat genome, by contrast, was annotated  
448 with a focus on protein-coding gene models [83], by consolidating protein and cDNA  
449 alignments – from exonerate [84] and tblastn [56] – with the annotation tool Evidence  
450 Modeller (EVM) [85]. Consequently, there are no unambiguous lncRNAs in the associated  
451 GTF  
452 ([ftp://ftp.ncbi.nlm.nih.gov/genomes/all/GCF/001/704/415/GCF\\_001704415.1\\_ARS1/GCF\\_0](ftp://ftp.ncbi.nlm.nih.gov/genomes/all/GCF/001/704/415/GCF_001704415.1_ARS1/GCF_0)  
453 [01704415.1\\_ARS1\\_genomic.gff.gz](ftp://ftp.ncbi.nlm.nih.gov/genomes/all/GCF/001/704/415/GCF_001704415.1_ARS1/genomic.gff.gz), accessed 23<sup>rd</sup> October 2017) (unlike the Ensembl-hosted  
454 sheep annotation, the goat annotation is currently only available via NCBI).  
455 Each longlist of candidates was assessed for coding potential using three different tools:  
456 CPAT v1.2.3 [54], which assigns coding probabilities to a given sequence based on  
457 differential hexamer usage [86] and Fickett TESTCODE score [87], PLEK v1.2, a support  
458 vector machine classifier utilising k-mer frequencies [55], and CPC v0.9-r2 [53], which was  
459 used in conjunction with the non-redundant sequence database, UniRef90 (the Uniref  
460 Reference Cluster, a clustered set of sequences from the UniProt KnowledgeBase that  
461 constitutes comprehensive coverage of sequence space at a resolution of 90% identity) [88,  
462 89] (<ftp://ftp.uniprot.org/pub/databases/uniprot/uniref/uniref90/uniref90.fasta.gz>, accessed  
463 18<sup>th</sup> August 2017). CPC scores putatively coding sequences positively and non-coding  
464 sequences negatively. We retained only those sequences with a CPC score < -0.5 (consistent  
465 with previous studies [31, 90]) and a CPAT probability < 0.58 (after creating sheep-specific  
466 coding and non-coding CPAT training data, from Oar v3.1 CDS and ncRNA, this cut-off is  
467 the intersection of two receiver operating characteristic curves, obtained using the R package

468 ROCR [91]; this cut-off is also used for the goat data, as there are insufficient non-coding  
469 training data for this species).

470 For each remaining gene model, we concatenated its exon sequence and identified the longest  
471 ORF within it. Should CPC, CPAT or PLEK make a false positive classification of ‘non-  
472 coding’, this translated ORF was considered the most likely peptide encoded by the gene.  
473 Gene models were further excluded if the translated ORF (a) contained a protein domain,  
474 based on a search by HMMER v3.1b2 [57] of the Pfam database of protein families, v31.0  
475 [60], with a threshold E-value of  $1 \times 10^{-5}$ , or (b) shared homology with a known peptide in the  
476 Swiss-Prot March 2016 release [58, 59], based on a search with BLAST+ v2.3.0 [56]: blastp  
477 with a threshold E-value of  $1 \times 10^{-5}$ . Shortlists of 12,296 (sheep) and 2657 (goat) candidate  
478 lncRNAs – each with three independent ‘non-coding’ classifications and no detectable blastp  
479 and HMMER hits – are given in Tables S1 and S2, respectively.

480

### 481 *Classification of lncRNAs*

482 Using the set of Oar v3.1 transcription start sites (TSS), obtained from Ensembl BioMart  
483 [92], and the set of ARS1 gene start sites  
484 ([ftp://ftp.ncbi.nlm.nih.gov/genomes/all/GCF/001/704/415/GCF\\_001704415.1\\_ARS1/GCF\\_001704415.1\\_ARS1\\_genomic.gff.gz](ftp://ftp.ncbi.nlm.nih.gov/genomes/all/GCF/001/704/415/GCF_001704415.1_ARS1/GCF_001704415.1_ARS1_genomic.gff.gz), accessed 23<sup>rd</sup> October 2017), we classified novel  
485 candidate lncRNAs for each species in the manner of [93], as either (a) sense or antisense (if  
486 the coordinates of the lncRNA overlap, or are encapsulated by, a known gene on the same, or  
487 opposite, strand), (b) up- or downstream, and on the same or opposite strand (if < 5kb from  
488 the nearest TSS), or (c) intergenic (if  $\geq$  5kb, 10kb, 20kb, 50kb, 100kb, 500kb or 1 Mb from  
489 the nearest TSS, irrespective of strand). The HISAT2/StringTie pipeline, used to generate  
490 these transcript models, cannot infer the transcription strand in all cases, particularly for  
491 single-exon transcripts. Accordingly, some lncRNAs will overlap the coordinates of a known  
492

493 gene, but its strandedness with respect to that gene – whether it is sense or antisense – will be  
494 unknown.

495

#### 496 *Conservation of lncRNAs in terms of sequence*

497 To assess the sequence-level conservation of sheep and goat lncRNA transcripts, we obtained  
498 human lncRNA sequences from two databases, NONCODE v5 [62]

499 ([http://www.noncode.org/datadownload/NONCODEv5\\_human.fa.gz](http://www.noncode.org/datadownload/NONCODEv5_human.fa.gz), accessed 27<sup>th</sup>

500 September 2017) and lncRNADB v2.0 [63]

501 ([http://www.lncrnadb.com/media/cms\\_page\\_media/10651/Sequences\\_lncrnadb\\_27Jan2015.c](http://www.lncrnadb.com/media/cms_page_media/10651/Sequences_lncrnadb_27Jan2015.csv)

502 sv, accessed 27<sup>th</sup> September 2017) (which contain 172,216 and 152 lncRNAs, respectively).

503 A previous study of lncRNAs in cattle [31] also generated a conservative set of 9778

504 lncRNAs, all of which were detectably expressed in at least one of 18 tissues (read count >

505 25 in each of three replicates per tissue). These sets of sequences constitute three independent

506 BLAST databases. For each sheep and goat lncRNA, blastn searches [56] were made against

507 each database using an arbitrarily high E-value of 10, as substantial sequence-level

508 conservation was not expected.

509

#### 510 *Conservation of lncRNAs in terms of synteny*

511 For each of the human (GRCh38.p10), sheep (Oar v3.1), cattle (UMD3.1) and goat (ARS1)

512 reference genomes, we established those regions in each pairwise comparison where gene

513 order is conserved, obtaining reference annotations from Ensembl BioMart v90 [92] (sheep,

514 cattle and human) and NCBI (goat;

515 [ftp://ftp.ncbi.nlm.nih.gov/genomes/all/GCF/001/704/415/GCF\\_001704415.1\\_ARS1/GCF\\_00](ftp://ftp.ncbi.nlm.nih.gov/genomes/all/GCF/001/704/415/GCF_001704415.1_ARS1/GCF_001704415.1_ARS1_genomic.gff.gz)

516 [1704415.1\\_ARS1\\_genomic.gff.gz](1704415.1_ARS1_genomic.gff.gz), accessed 27<sup>th</sup> September 2017). By advancing a sliding

517 window across each chromosome gene-by-gene from the 5' end, we identified the first

518 upstream and first downstream gene of each focal gene, irrespective of strand. For the  
519 purpose of this analysis, the first and last genes on each chromosome are excluded, having no  
520 upstream or downstream neighbour, respectively. For each pairwise species comparison, we  
521 then determined which set of blocks were present in both – that is, where the HGNC symbols  
522 for upstream gene/focal gene/downstream gene were identical. These syntenic blocks, of  
523 three consecutive genes each, are regions in the genome where gene order is conserved both  
524 up- and downstream of a focal gene: between sheep and cattle, there are 2927 regions  
525 (comprising 5601 unique genes); sheep and goat, 2038 regions (3883 unique genes); cattle  
526 and goat, 2982 regions (5258 unique genes); sheep and human, 380 regions (930 unique  
527 genes); goat and human, 527 regions (1262 unique genes); cattle and human, 443 regions  
528 (1063 unique genes). If in each syntenic block a lncRNA was found between the upstream  
529 and focal gene, or the focal and downstream gene, in only one of the two species, a global  
530 alignment was made between the transcript and the intergenic region of the corresponding  
531 species. Alignments were made using the Needleman-Wunsch algorithm, as implemented by  
532 the ‘needle’ module of EMBOSS v6.6.0 [94], with default parameters. By effectively treating  
533 lncRNA transcripts as if they were CAGE tags (that is, short reads of 20-50 nucleotides [95]),  
534 we considered successful alignments to be those containing one or more consecutive runs of  
535 20 identical residues, without gaps (the majority of these alignments in any case have  $\geq$   
536 75% identity across the entire length of the transcript (Table S18)). The probability that a  
537 transcript randomly matches 20 consecutive residues, within a pre-defined region, is  
538 extremely low.

539 For successful alignments, the target sequence (that is, an extract from the intergenic region)  
540 was considered a novel lncRNA. For this analysis, the sheep and goat lncRNAs used are  
541 those from their respective shortlists (Tables S1 and S2). lncRNA locations in other species  
542 are obtained from previous studies applying similarly conservative classification criteria. For

543 cattle, 9778 lncRNAs were obtained [31], each of which were >200bp, considered non-  
544 coding by the classification tools CPC [53] and CNCI [96], lacked sequence similarity to the  
545 NCBI nr [45] and Pfam databases [60], and had a normalised read count > 25 in at least 2 of  
546 3 replicates per tissue for 18 tissues. For human, 17,134 lncRNAs were obtained [72], each of  
547 which were assembled from >250bp transfrags, considered non-coding by the classification  
548 tool CPAT [54], lacked sequence similarity to the Pfam database [60], and had active  
549 transcription confirmed by intersecting intervals surrounding the transcriptional start site with  
550 chromatin immunoprecipitation and sequencing (ChIP-seq) data from 13 cell lines.

551

### 552 *Expression level quantification*

553 For the 11 ‘core’ tissues of the sheep expression atlas, plus unstimulated and LPS-stimulated  
554 BMDMs (detailed in S2 Table of [45] and available under ENA accession PRJEB19199),  
555 expression was quantified using Kallisto v0.43.0 [66] with a k-mer index (k=31) derived after  
556 supplementing the Oar v3.1 reference transcriptome with the shortlist of 11,646 novel sheep  
557 lncRNA models (Table S1) and those lncRNAs assembled in either human (n = 18), goat  
558 (n=164), or cattle (n=1219), and which map to a conserved region of the sheep genome  
559 (Table S15). Oar v3.1 transcripts were obtained from Ensembl v90 [92] in the form of  
560 separate files for 22,823 CDS ([ftp://ftp.ensembl.org/pub/release-](ftp://ftp.ensembl.org/pub/release-90/fasta/ovis_aries/cds/Ovis_aries.Oar_v3.1.cds.all.fa.gz)  
561 [90/fasta/ovis\\_aries/cds/Ovis\\_aries.Oar\\_v3.1.cds.all.fa.gz](ftp://ftp.ensembl.org/pub/release-90/fasta/ovis_aries/cds/Ovis_aries.Oar_v3.1.cds.all.fa.gz), accessed 27<sup>th</sup> September 2017) and  
562 6005 ncRNAs ([ftp://ftp.ensembl.org/pub/release-](ftp://ftp.ensembl.org/pub/release-90/fasta/ovis_aries/ncrna/Ovis_aries.Oar_v3.1.ncrna.fa.gz)  
563 [90/fasta/ovis\\_aries/ncrna/Ovis\\_aries.Oar\\_v3.1.ncrna.fa.gz](ftp://ftp.ensembl.org/pub/release-90/fasta/ovis_aries/ncrna/Ovis_aries.Oar_v3.1.ncrna.fa.gz), accessed 27<sup>th</sup> September 2017).  
564 An equivalent set of expression estimates was made for goat, across the 21 tissues and cell  
565 types of the goat expression atlas (i.e., 54 RNA-seq libraries available under ENA accession  
566 PRJEB23196). 47,193 transcripts, from assembly ARS1, were obtained from NCBI  
567 ([ftp://ftp.ncbi.nlm.nih.gov/genomes/all/GCF/001/704/415/GCF\\_001704415.1\\_ARS1/GCF\\_0](ftp://ftp.ncbi.nlm.nih.gov/genomes/all/GCF/001/704/415/GCF_001704415.1_ARS1/GCF_0)



568 01704415.1\_ARIS1\_rna.fna.gz, accessed 27<sup>th</sup> September 2017), and supplemented both with  
569 the shortlist of 2657 novel goat lncRNA models (Table S2), and those lncRNAs assembled in  
570 human (n = 15), sheep (n = 507), or cattle (n= 1213) (Table S15). After quantification in each  
571 species, transcript-level abundances were summarised to the gene-level.

572

### 573 ***Categorisation of expression profiles***

574 Expression levels were categorised in the manner of the Human Protein Atlas [97], and as  
575 previously employed in the Sheep Gene Expression Atlas [45]. Each gene is considered to  
576 have either no expression (average TPM < 1, a threshold chosen to minimise the influence of  
577 stochastic sampling), low expression (10 > average TPM ≥ 1), medium expression (50 >  
578 average TPM > 10), or high expression (average TPM ≥ 50). Two sample specificity indices  
579 were calculated for each gene, as in [45]: firstly, *tau*, a scalar measure of expression breadth  
580 bound between 0 (for housekeeping genes) and 1 (for genes expressed in one sample only)  
581 [70], and secondly, the mean TPM (across all samples) divided by the median TPM (across  
582 all tissues). Genes with greater sample specificity will have a more strongly skewed  
583 distribution (i.e. a higher mean and a lower median), and so the larger the ratio, the more  
584 sample-specific the expression. To avoid undefined values, should median TPM be 0, it is  
585 considered instead to be 0.01.

586 Each gene is also assigned one or more categories, to allow an at-a-glance overview of its  
587 expression profile: (a) ‘tissue enriched’ (expression in one tissue at least five-fold higher than  
588 all other tissues [‘tissue specific’ if all other tissues have 0 TPM]), (b) ‘tissue enhanced’  
589 (five-fold higher average TPM in one or more tissues compared to the mean TPM of all  
590 tissues with detectable expression [this category is mutually exclusive with ‘tissue enriched’),  
591 (c) ‘group enriched’ (five-fold higher average TPM in a group of two or more tissues  
592 compared to all other tissues (‘groups’ are analogous to organ systems, and are as described

593 in the sheep expression atlas [45]), (d) mixed expression (detected in one or more tissues and  
594 neither of the previous categories), (e) ‘expressed in all’ ( $\geq 1$  TPM in all tissues), and (f)  
595 ‘not detected’ ( $< 1$  TPM in all tissues).

596

### 597 *Network analysis*

598 Network analysis of the sheep expression level data was performed using Graphia Professional  
599 (Kajeka Ltd, Edinburgh, UK), a commercial version of BioLayout *Express*<sup>3D</sup> [81, 82]. A correlation  
600 matrix was built for each gene-to-gene comparison, which was then filtered by removing all  
601 correlations below a given threshold (Pearson’s  $r < 0.95$ ). A network graph was then constructed by  
602 connecting nodes (genes) with edges (correlations above the threshold). The local structure of the  
603 graph – that is, clusters of co-expressed genes (detailed in Table S23) – was interpreted by applying  
604 the Markov clustering (MCL) algorithm [80] at an inflation value (which determines cluster  
605 granularity) of 2.2.

606

### 607 *Enrichment of lncRNAs in the vicinity of protein-coding genes*

608 To test whether lncRNAs co-expressed with protein-coding genes are more likely to be closer  
609 to them (from which we can infer they are more likely to have been derived from an enhancer  
610 sequence affecting that protein-coding gene), we employed a randomisation test in the  
611 manner of [98]. We first obtained clusters of co-expressed genes from a network graph of the  
612 sheep expression level dataset (see above). We then calculated  $q$ , the number of times the  
613 distance between each lncRNA and the nearest protein-coding gene within the same cluster  
614 was higher than the distance between each lncRNA and the nearest gene within  $s = 1000$   
615 randomly selected, equally sized, subsets of protein-coding genes, drawn from the same  
616 chromosome as each lncRNA. Letting  $r = s - q$ , then the p-value of this test is  $r+1/s+1$ .

617

618 **Declarations**

619

620 ***Acknowledgements***

621 The authors would like to thank the farm staff at Dryden farm and members of the sheep  
622 tissue collection team from The Roslin Institute and R(D)SVS who were involved in tissue  
623 collections for the sheep gene expression atlas project. Rachel Young and Lucas Lefevre  
624 isolated the bone marrow derived macrophages and Zofia Lisowski provided technical  
625 assistance with collection and post mortem for the goat samples. Technical expertise for  
626 dissection of the sheep brain samples was provided by Fiona Houston and heart samples by  
627 Kim Summers and Hiu-Gwen Tsang. The authors are also grateful for the support of the  
628 FAANG Data Coordination Centre in the upload and archiving of the sample data and  
629 metadata.

630

631 ***Funding***

632 This work was supported by a Biotechnology and Biological Sciences Research Council  
633 (BBSRC; [www.bbsrc.ac.uk](http://www.bbsrc.ac.uk)) grant BB/L001209/1 ('Functional Annotation of the Sheep  
634 Genome') and Institute Strategic Program grants 'Farm Animal Genomics'  
635 (BBS/E/D/2021550), 'Blueprints for Healthy Animals' (BB/P013732/1) and  
636 'Transcriptomes, Networks and Systems' (BBS/E/D/20211552). The goat RNA-seq data was  
637 funded by the Roslin Foundation ([www.roslinfoundation.com](http://www.roslinfoundation.com)) which also supported SJB.  
638 CM was supported by a Newton Fund PhD studentship ([www.newtonfund.ac.uk](http://www.newtonfund.ac.uk)). Edinburgh  
639 Genomics is partly supported through core grants from the BBSRC (BB/J004243/1), National  
640 Research Council (NERC; [www.nationalacademies.org.uk/nrc](http://www.nationalacademies.org.uk/nrc)) (R8/H10/56), and Medical  
641 Research Council (MRC; [www.mrc.ac.uk](http://www.mrc.ac.uk)) (MR/K001744/1). The funders had no role in

642 study design, data collection and analysis, decision to publish, or preparation of the  
643 manuscript.

644

645 ***Ethics approval and consent to participate***

646 Approval was obtained from The Roslin Institute's and the University of Edinburgh's Protocols and  
647 Ethics Committees. All animal work was carried out under the regulations of the Animals (Scientific  
648 Procedures) Act 1986.

649

650 ***Competing interests***

651 The authors declare they have no competing interests.

652

653 ***Data availability***

654 The raw RNA-sequencing data are deposited in the European Nucleotide Archive (ENA)  
655 under study accessions PRJEB19199 (sheep) and PRJEB23196 (goat). Sample metadata for  
656 all tissue and cell samples, prepared in accordance with FAANG consortium metadata  
657 standards, are deposited in the EBI BioSamples database under group identifiers  
658 SAMEG317052 (sheep) and SAMEG330351 (goat). All experimental protocols are available  
659 on the FAANG consortium website at <http://ftp.faang.ebi.ac.uk/ftp/protocols>.

660

661 **Tables**  
662

| Species 1 | Species 2 | No. of syntenic blocks (i.e. three conserved consecutive genes) | No. of unique protein-coding genes in the set of syntenic blocks | Total no. of positionally conserved lncRNAs in the set of syntenic blocks (in either the up- or downstream position) | % of syntenic blocks with at least one positionally conserved lncRNA |
|-----------|-----------|-----------------------------------------------------------------|------------------------------------------------------------------|----------------------------------------------------------------------------------------------------------------------|----------------------------------------------------------------------|
| sheep     | cattle    | 2927                                                            | 5601                                                             | 280                                                                                                                  | 9.57                                                                 |
| sheep     | goat      | 2038                                                            | 3883                                                             | 82                                                                                                                   | 4.02                                                                 |
| sheep     | human     | 380                                                             | 930                                                              | 8                                                                                                                    | 2.11                                                                 |
| goat      | cattle    | 2982                                                            | 5258                                                             | 169                                                                                                                  | 5.67                                                                 |
| goat      | human     | 527                                                             | 1262                                                             | 2                                                                                                                    | 0.38                                                                 |
| cattle    | human     | 443                                                             | 1063                                                             | 5                                                                                                                    | 1.13                                                                 |

663  
664 **Table 1.** Comparatively few lncRNAs appear positionally conserved, suggesting minimal overlap between each species' set of assembled  
665 transcripts. This suggests that those lncRNAs expected to be found at a given genomic location are captured in only one species, not both,  
666 consistent with the stochastic sampling of lncRNAs by RNA-seq libraries.  
667

| Species 1 (in which lncRNA is captured by RNA-seq libraries) | Species 2 (in which lncRNA can be inferred) | No. of lncRNA models detected within a region of conserved synteny between species 1 and 2, but not captured by the RNA-seq libraries of species 2 | No. of lncRNA models from species 1 mapped to the genome of species 2 | % of lncRNA models detected by direct genome mapping | Number of intergenic regions in the syntenic blocks conserved between these two species | % of intergenic regions in which a lncRNA from species 1 is inferred in species 2 |
|--------------------------------------------------------------|---------------------------------------------|----------------------------------------------------------------------------------------------------------------------------------------------------|-----------------------------------------------------------------------|------------------------------------------------------|-----------------------------------------------------------------------------------------|-----------------------------------------------------------------------------------|
|                                                              | goat                                        | 2593                                                                                                                                               | 1213                                                                  | 46.78                                                | 5964                                                                                    | 20.34                                                                             |
| cattle                                                       | human                                       | 163                                                                                                                                                | 20                                                                    | 12.27                                                | 886                                                                                     | 2.26                                                                              |
|                                                              | sheep                                       | 2939                                                                                                                                               | 1219                                                                  | 41.48                                                | 5854                                                                                    | 20.82                                                                             |
| goat                                                         | cattle                                      | 2593                                                                                                                                               | 286                                                                   | 11.03                                                | 5964                                                                                    | 4.8                                                                               |

|       |        |      |     |       |      |       |
|-------|--------|------|-----|-------|------|-------|
|       | human  | 76   | 9   | 11.84 | 1054 | 0.85  |
|       | sheep  | 991  | 164 | 16.55 | 4076 | 4.02  |
|       | cattle | 163  | 16  | 9.82  | 886  | 1.81  |
| human | goat   | 76   | 15  | 19.74 | 1054 | 1.42  |
|       | sheep  | 93   | 18  | 19.35 | 760  | 2.37  |
|       | cattle | 2939 | 775 | 26.37 | 5854 | 13.24 |
| sheep | goat   | 991  | 507 | 51.16 | 4076 | 12.44 |
|       | human  | 93   | 15  | 16.13 | 760  | 1.97  |

668

669

670 **Table 2.** lncRNA transcripts assembled using the RNA-seq libraries of only one species can in many cases be directly mapped to the genome of  
671 another species, assuming the lncRNA is located within a region of conserved synteny.

672 **References**

673

- 674 1. Ponting CP, Oliver PL, Reik W: **Evolution and functions of long noncoding RNAs.** *Cell* 2009, **136**:629-641.
- 675
- 676 2. Engreitz JM, Ollikainen N, Guttman M: **Long non-coding RNAs: spatial amplifiers**  
677 **that control nuclear structure and gene expression.** *Nat Rev Mol Cell Biol* 2016,  
678 **17**:756-770.
- 679 3. Rinn JL, Chang HY: **Genome regulation by long noncoding RNAs.** *Annu Rev*  
680 *Biochem* 2012, **81**:145-166.
- 681 4. Chen J, Xue Y: **Emerging roles of non-coding RNAs in epigenetic regulation.** *Sci*  
682 *China Life Sci* 2016, **59**:227-235.
- 683 5. Kung JT, Colognori D, Lee JT: **Long noncoding RNAs: past, present, and future.**  
684 *Genetics* 2013, **193**:651-669.
- 685 6. Quinn JJ, Chang HY: **Unique features of long non-coding RNA biogenesis and**  
686 **function.** *Nat Rev Genet* 2016, **17**:47-62.
- 687 7. Villegas VE, Zaphiropoulos PG: **Neighboring Gene Regulation by Antisense Long**  
688 **Non-Coding RNAs.** *International Journal of Molecular Sciences* 2015, **16**:3251-  
689 3266.
- 690 8. Goff LA, Rinn JL: **Linking RNA biology to lncRNAs.** *Genome Research* 2015,  
691 **25**:1456-1465.
- 692 9. Cech TR, Steitz JA: **The noncoding RNA revolution-trashing old rules to forge**  
693 **new ones.** *Cell* 2014, **157**:77-94.
- 694 10. Kapranov P, St Laurent G, Raz T, Ozsolak F, Reynolds CP, Sorensen PHB, Reaman  
695 G, Milos P, Arceci RJ, Thompson JF, Triche TJ: **The majority of total nuclear-**  
696 **encoded non-ribosomal RNA in a human cell is 'dark matter' un-annotated**  
697 **RNA.** *BMC Biology* 2010, **8**:149.
- 698 11. van Bakel H, Nislow C, Blencowe BJ, Hughes TR: **Most “Dark Matter”**  
699 **Transcripts Are Associated With Known Genes.** *PLOS Biology* 2010, **8**:e1000371.
- 700 12. Kornienko AE, Dotter CP, Guenzl PM, Gisslinger H, Gisslinger B, Cleary C,  
701 Kralovics R, Pauler FM, Barlow DP: **Long non-coding RNAs display higher**  
702 **natural expression variation than protein-coding genes in healthy humans.**  
703 *Genome Biology* 2016, **17**:14.
- 704 13. Mercer TR, Dinger ME, Sunkin SM, Mehler MF, Mattick JS: **Specific expression of**  
705 **long noncoding RNAs in the mouse brain.** *Proc Natl Acad Sci U S A* 2008,  
706 **105**:716-721.
- 707 14. Gloss BS, Dinger ME: **The specificity of long noncoding RNA expression.**  
708 *Biochimica et Biophysica Acta (BBA) - Gene Regulatory Mechanisms* 2016, **1859**:16-  
709 22.
- 710 15. Qiu JJ, Ren ZR, Yan JB: **Identification and functional analysis of long non-coding**  
711 **RNAs in human and mouse early embryos based on single-cell transcriptome**  
712 **data.** *Oncotarget* 2016, **7**:61215-61228.
- 713 16. Zhang K, Huang K, Luo Y, Li S: **Identification and functional analysis of long**  
714 **non-coding RNAs in mouse cleavage stage embryonic development based on**  
715 **single cell transcriptome data.** *BMC Genomics* 2014, **15**:845.
- 716 17. Pauli A, Valen E, Lin MF, Garber M, Vastenhouw NL, Levin JZ, Fan L, Sandelin A,  
717 Rinn JL, Regev A, Schier AF: **Systematic identification of long noncoding RNAs**  
718 **expressed during zebrafish embryogenesis.** *Genome Res* 2012, **22**:577-591.
- 719 18. Cabili MN, Trapnell C, Goff L, Koziol M, Tazon-Vega B, Regev A, Rinn JL:  
720 **Integrative annotation of human large intergenic noncoding RNAs reveals global**  
721 **properties and specific subclasses.** *Genes Dev* 2011, **25**:1915-1927.

- 722 19. Johnsson P, Lipovich L, Grander D, Morris KV: **Evolutionary conservation of long**  
723 **non-coding RNAs; sequence, structure, function.** *Biochim Biophys Acta* 2014,  
724 **1840**:1063-1071.
- 725 20. Andersson R, Refsing Andersen P, Valen E, Core LJ, Bornholdt J, Boyd M, Heick  
726 Jensen T, Sandelin A: **Nuclear stability and transcriptional directionality separate**  
727 **functionally distinct RNA species.** *Nat Commun* 2014, **5**:5336.
- 728 21. Jia H, Osak M, Bogu GK, Stanton LW, Johnson R, Lipovich L: **Genome-wide**  
729 **computational identification and manual annotation of human long noncoding**  
730 **RNA genes.** *RNA* 2010, **16**:1478-1487.
- 731 22. Maeda N, Kasukawa T, Oyama R, Gough J, Frith M, Engstrom PG, Lenhard B,  
732 Aturaliya RN, Batalov S, Beisel KW, et al: **Transcript annotation in FANTOM3:**  
733 **mouse gene catalog based on physical cDNAs.** *PLoS Genet* 2006, **2**:e62.
- 734 23. Sasaki YT, Sano M, Ideue T, Kin T, Asai K, Hirose T: **Identification and**  
735 **characterization of human non-coding RNAs with tissue-specific expression.**  
736 *Biochem Biophys Res Commun* 2007, **357**:991-996.
- 737 24. Ravasi T, Suzuki H, Pang KC, Katayama S, Furuno M, Okunishi R, Fukuda S, Ru K,  
738 Frith MC, Gongora MM, et al: **Experimental validation of the regulated expression**  
739 **of large numbers of non-coding RNAs from the mouse genome.** *Genome Res*  
740 2006, **16**:11-19.
- 741 25. Katayama S, Tomaru Y, Kasukawa T, Waki K, Nakanishi M, Nakamura M, Nishida  
742 H, Yap CC, Suzuki M, Kawai J, et al: **Antisense transcription in the mammalian**  
743 **transcriptome.** *Science* 2005, **309**:1564-1566.
- 744 26. Mattick JS, Rinn JL: **Discovery and annotation of long noncoding RNAs.** *Nat*  
745 *Struct Mol Biol* 2015, **22**:5-7.
- 746 27. Balwiercz PJ, Carninci P, Daub CO, Kawai J, Hayashizaki Y, Van Belle W, Beisel C,  
747 van Nimwegen E: **Methods for analyzing deep sequencing expression data:**  
748 **constructing the human and mouse promoterome with deepCAGE data.** *Genome*  
749 *Biol* 2009, **10**:R79.
- 750 28. McIntyre LM, Lopiano KK, Morse AM, Amin V, Oberg AL, Young LJ, Nuzhdin SV:  
751 **RNA-seq: technical variability and sampling.** *BMC Genomics* 2011, **12**:1-13.
- 752 29. Steijger T, Abril JF, Engstrom PG, Kokocinski F, Hubbard TJ, Guigo R, Harrow J,  
753 Bertone P: **Assessment of transcript reconstruction methods for RNA-seq.** *Nat*  
754 *Methods* 2013, **10**:1177-1184.
- 755 30. Hon C-C, Ramilowski JA, Harshbarger J, Bertin N, Rackham OJL, Gough J,  
756 Denisenko E, Schmeier S, Poulsen TM, Severin J, et al: **An atlas of human long**  
757 **non-coding RNAs with accurate 5' ends.** *Nature* 2017, **543**:199-204.
- 758 31. Koufariotis LT, Chen YP, Chamberlain A, Vander Jagt C, Hayes BJ: **A catalogue of**  
759 **novel bovine long noncoding RNA across 18 tissues.** *PLoS One* 2015,  
760 **10**:e0141225.
- 761 32. Zhou ZY, Li AM, Adeola AC, Liu YH, Irwin DM, Xie HB, Zhang YP: **Genome-**  
762 **wide identification of long intergenic noncoding RNA genes and their potential**  
763 **association with domestication in pigs.** *Genome Biol Evol* 2014, **6**:1387-1392.
- 764 33. Scott EY, Mansour T, Bellone RR, Brown CT, Mienaltowski MJ, Penedo MC, Ross  
765 PJ, Valberg SJ, Murray JD, Finno CJ: **Identification of long non-coding RNA in the**  
766 **horse transcriptome.** *BMC Genomics* 2017, **18**:511.
- 767 34. Billerey C, Boussaha M, Esquerré D, Rebours E, Djari A, Meersseman C, Klopp C,  
768 Gautheret D, Rocha D: **Identification of large intergenic non-coding RNAs in**  
769 **bovine muscle using next-generation transcriptomic sequencing.** *BMC Genomics*  
770 2014, **15**:499.



- 771 35. Liu XF, Ding XB, Li X, Jin CF, Yue YW, Li GP, Guo H: **An atlas and analysis of**  
772 **bovine skeletal muscle long noncoding RNAs.** *Anim Genet* 2017, **48**:278-286.
- 773 36. Weikard R, Hadlich F, Kuehn C: **Identification of novel transcripts and noncoding**  
774 **RNAs in bovine skin by deep next generation sequencing.** *BMC Genomics* 2013,  
775 **14**:789.
- 776 37. Yu L, Tai L, Zhang L, Chu Y, Li Y, Zhou L: **Comparative analyses of long non-**  
777 **coding RNA in lean and obese pig.** *Oncotarget* 2017, **8**:41440-41450.
- 778 38. Wang J, Hua L, Chen J, Zhang J, Bai X, Gao B, Li C, Shi Z, Sheng W, Gao Y, Xing  
779 B: **Identification and characterization of long non-coding RNAs in subcutaneous**  
780 **adipose tissue from castrated and intact full-sib pair Huainan male pigs.** *BMC*  
781 *Genomics* 2017, **18**:542.
- 782 39. Xia J, Xin L, Zhu W, Li L, Li C, Wang Y, Mu Y, Yang S, Li K: **Characterization of**  
783 **long non-coding RNA transcriptome in high-energy diet induced nonalcoholic**  
784 **steatohepatitis minipigs.** *Scientific Reports* 2016, **6**:30709.
- 785 40. Esteve-Codina A, Kofler R, Palmieri N, Bussotti G, Notredame C, Pérez-Enciso M:  
786 **Exploring the gonad transcriptome of two extreme male pigs with RNA-seq.**  
787 *BMC Genomics* 2011, **12**:552.
- 788 41. Engreitz JM, Haines JE, Perez EM, Munson G, Chen J, Kane M, McDonel PE,  
789 Guttman M, Lander ES: **Local regulation of gene expression by lncRNA**  
790 **promoters, transcription and splicing.** *Nature* 2016, **539**:452-455.
- 791 42. Derrien T, Johnson R, Bussotti G, Tanzer A, Djebali S, Tilgner H, Guernec G, Martin  
792 D, Merkel A, Knowles DG, et al: **The GENCODE v7 catalog of human long**  
793 **noncoding RNAs: Analysis of their gene structure, evolution, and expression.**  
794 *Genome Research* 2012, **22**:1775-1789.
- 795 43. Carninci P, Kasukawa T, Katayama S, Gough J, Frith MC, Maeda N, Oyama R,  
796 Ravasi T, Lenhard B, Wells C, et al: **The transcriptional landscape of the**  
797 **mammalian genome.** *Science* 2005, **309**:1559-1563.
- 798 44. Roux BT, Heward JA, Donnelly LE, Jones SW, Lindsay MA: **Catalog of**  
799 **Differentially Expressed Long Non-Coding RNA following Activation of Human**  
800 **and Mouse Innate Immune Response.** *Frontiers in Immunology* 2017, **8**:1038.
- 801 45. Clark EL, Bush SJ, McCulloch MEB, Farquhar IL, Young R, Lefevre L, Pridans C,  
802 Tsang H, Wu C, Afrasiabi C, et al: **A high resolution atlas of gene expression in the**  
803 **domestic sheep (*Ovis aries*).** *PLoS Genet* 2017, **13**:e1006997.
- 804 46. Kumar S, Stecher G, Suleski M, Hedges SB: **TimeTree: A Resource for Timelines,**  
805 **Timetrees, and Divergence Times.** *Mol Biol Evol* 2017, **34**:1812-1819.
- 806 47. Weikard R, Demasius W, Kuehn C: **Mining long noncoding RNA in livestock.** *Anim*  
807 *Genet* 2017, **48**:3-18.
- 808 48. Andersson L, Archibald AL, Bottema CD, Brauning R, Burgess SC, Burt DW, Casas  
809 E, Cheng HH, Clarke L, Couldrey C, et al: **Coordinated international action to**  
810 **accelerate genome-to-phenome with FAANG, the Functional Annotation of**  
811 **Animal Genomes project.** *Genome Biology* 2015, **16**:57.
- 812 49. Tuggle CK, Giuffra E, White SN, Clarke L, Zhou H, Ross PJ, Acloque H, Reecy JM,  
813 Archibald A, Bellone RR, et al: **GO-FAANG meeting: a Gathering On Functional**  
814 **Annotation of Animal Genomes.** *Animal Genetics* 2016, **47**:528-533.
- 815 50. Kim D, Langmead B, Salzberg SL: **HISAT: a fast spliced aligner with low memory**  
816 **requirements.** *Nat Meth* 2015, **12**:357-360.
- 817 51. Pertea M, Pertea GM, Antonescu CM, Chang T-C, Mendell JT, Salzberg SL:  
818 **StringTie enables improved reconstruction of a transcriptome from RNA-seq**  
819 **reads.** *Nat Biotech* 2015, **33**:290-295.

- 820 52. Ilott NE, Ponting CP: **Predicting long non-coding RNAs using RNA sequencing.**  
821 *Methods* 2013, **63**:50-59.
- 822 53. Kong L, Zhang Y, Ye Z-Q, Liu X-Q, Zhao S-Q, Wei L, Gao G: **CPC: assess the**  
823 **protein-coding potential of transcripts using sequence features and support**  
824 **vector machine.** *Nucleic Acids Research* 2007, **35**:W345-W349.
- 825 54. Wang L, Park HJ, Dasari S, Wang S, Kocher J-P, Li W: **CPAT: Coding-Potential**  
826 **Assessment Tool using an alignment-free logistic regression model.** *Nucleic Acids*  
827 *Research* 2013.
- 828 55. Li A, Zhang J, Zhou Z: **PLEK: a tool for predicting long non-coding RNAs and**  
829 **messenger RNAs based on an improved k-mer scheme.** *BMC Bioinformatics* 2014,  
830 **15**:311.
- 831 56. Camacho C, Coulouris G, Avagyan V, Ma N, Papadopoulos J, Bealer K, Madden TL:  
832 **BLAST+: architecture and applications.** *BMC Bioinformatics* 2009, **10**:421.
- 833 57. Mistry J, Finn RD, Eddy SR, Bateman A, Punta M: **Challenges in homology search:**  
834 **HMMER3 and convergent evolution of coiled-coil regions.** *Nucleic Acids Research*  
835 2013, **41**:e121.
- 836 58. Boutet E, Lieberherr D, Tognolli M, Schneider M, Bairoch A: **UniProtKB/Swiss-**  
837 **Prot.** *Methods Mol Biol* 2007, **406**:89-112.
- 838 59. The UniProt Consortium: **UniProt: a hub for protein information.** *Nucleic Acids*  
839 *Res* 2015, **43**:D204-212.
- 840 60. Finn RD, Coghill P, Eberhardt RY, Eddy SR, Mistry J, Mitchell AL, Potter SC, Punta  
841 M, Qureshi M, Sangrador-Vegas A, et al: **The Pfam protein families database:**  
842 **towards a more sustainable future.** *Nucleic Acids Research* 2016, **44**:D279-D285.
- 843 61. Liu SJ, Nowakowski TJ, Pollen AA, Lui JH, Horlbeck MA, Attenello FJ, He D,  
844 Weissman JS, Kriegstein AR, Diaz AA, Lim DA: **Single-cell analysis of long non-**  
845 **coding RNAs in the developing human neocortex.** *Genome Biology* 2016, **17**:67.
- 846 62. Zhao Y, Li H, Fang S, Kang Y, Wu W, Hao Y, Li Z, Bu D, Sun N, Zhang MQ, Chen  
847 R: **NONCODE 2016: an informative and valuable data source of long non-coding**  
848 **RNAs.** *Nucleic Acids Research* 2016, **44**:D203-D208.
- 849 63. Quek XC, Thomson DW, Maag JL, Bartonicek N, Signal B, Clark MB, Gloss BS,  
850 Dinger ME: **lncRNADB v2.0: expanding the reference database for functional**  
851 **long noncoding RNAs.** *Nucleic Acids Res* 2015, **43**:D168-173.
- 852 64. Bajic VB, Tan SL, Christoffels A, Schonbach C, Lipovich L, Yang L, Hofmann O,  
853 Kruger A, Hide W, Kai C, et al: **Mice and men: their promoter properties.** *PLoS*  
854 *Genet* 2006, **2**:e54.
- 855 65. Necsulea A, Soumillon M, Warnefors M, Liechti A, Daish T, Zeller U, Baker JC,  
856 Grützner F, Kaessmann H: **The evolution of lncRNA repertoires and expression**  
857 **patterns in tetrapods.** *Nature* 2014, **505**:635.
- 858 66. Bray NL, Pimentel H, Melsted P, Pachter L: **Near-optimal probabilistic RNA-seq**  
859 **quantification.** *Nat Biotech* 2016, **34**:525-527.
- 860 67. Tsoi LC, Iyer MK, Stuart PE, Swindell WR, Gudjonsson JE, Tejasvi T, Sarkar MK,  
861 Li B, Ding J, Voorhees JJ, et al: **Analysis of long non-coding RNAs highlights**  
862 **tissue-specific expression patterns and epigenetic profiles in normal and psoriatic**  
863 **skin.** *Genome Biol* 2015, **16**:24.
- 864 68. Jiang C, Li Y, Zhao Z, Lu J, Chen H, Ding N, Wang G, Xu J, Li X: **Identifying and**  
865 **functionally characterizing tissue-specific and ubiquitously expressed human**  
866 **lncRNAs.** *Oncotarget* 2016, **7**:7120-7133.
- 867 69. Wu W, Wagner EK, Hao Y, Rao X, Dai H, Han J, Chen J, Storniollo AM, Liu Y, He  
868 C: **Tissue-specific Co-expression of Long Non-coding and Coding RNAs**  
869 **Associated with Breast Cancer.** *Sci Rep* 2016, **6**:32731.

- 870 70. Yanai I, Benjamin H, Shmoish M, Chalifa-Caspi V, Shklar M, Ophir R, Bar-Even A,  
871 Horn-Saban S, Safran M, Domany E, et al: **Genome-wide midrange transcription**  
872 **profiles reveal expression level relationships in human tissue specification.**  
873 *Bioinformatics* 2005, **21**:650-659.
- 874 71. Zhang Y, Yang H, Han L, Li F, Zhang T, Pang J, Feng X, Ren C, Mao S, Wang F:  
875 **Long noncoding RNA expression profile changes associated with dietary energy**  
876 **in the sheep testis during sexual maturation.** *Sci Rep* 2017, **7**:5180.
- 877 72. Iyer MK, Niknafs YS, Malik R, Singhal U, Sahu A, Hosono Y, Barrette TR, Prensner  
878 JR, Evans JR, Zhao S, et al: **The Landscape of Long Noncoding RNAs in the**  
879 **Human Transcriptome.** *Nature genetics* 2015, **47**:199-208.
- 880 73. Bouckenheimer J, Assou S, Riquier S, Hou C, Philippe N, Sansac C, Lavabre-  
881 Bertrand T, Commes T, Lemaitre JM, Boureux A, De Vos J: **Long non-coding RNAs**  
882 **in human early embryonic development and their potential in ART.** *Hum Reprod*  
883 *Update* 2016, **23**:19-40.
- 884 74. Karlic R, Ganesh S, Franke V, Svobodova E, Urbanova J, Suzuki Y, Aoki F,  
885 Vlahovicek K, Svoboda P: **Long non-coding RNA exchange during the oocyte-to-**  
886 **embryo transition in mice.** *DNA Res* 2017, **24**:129-141.
- 887 75. Li W, Notani D, Rosenfeld MG: **Enhancers as non-coding RNA transcription**  
888 **units: recent insights and future perspectives.** *Nat Rev Genet* 2016, **17**:207-223.
- 889 76. Chen H, Du G, Song X, Li L: **Non-coding Transcripts from Enhancers: New**  
890 **Insights into Enhancer Activity and Gene Expression Regulation.** *Genomics,*  
891 *Proteomics & Bioinformatics* 2017, **15**:201-207.
- 892 77. De Santa F, Barozzi I, Mietton F, Ghisletti S, Polletti S, Tusi BK, Muller H,  
893 Ragoussis J, Wei C-L, Natoli G: **A Large Fraction of Extragenic RNA Pol II**  
894 **Transcription Sites Overlap Enhancers.** *PLOS Biology* 2010, **8**:e1000384.
- 895 78. Kim TK, Hemberg M, Gray JM, Costa AM, Bear DM, Wu J, Harmin DA, Laptewicz  
896 M, Barbara-Haley K, Kuersten S, et al: **Widespread transcription at neuronal**  
897 **activity-regulated enhancers.** *Nature* 2010, **465**:182-187.
- 898 79. Natoli G, Andrau JC: **Noncoding transcription at enhancers: general principles**  
899 **and functional models.** *Annu Rev Genet* 2012, **46**:1-19.
- 900 80. van Dongen S, Abreu-Goodger C: **Using MCL to extract clusters from networks.**  
901 *Methods Mol Biol* 2012, **804**:281-295.
- 902 81. Freeman TC, Goldovsky L, Brosch M, van Dongen S, Maziere P, Grocock RJ,  
903 Freilich S, Thornton J, Enright AJ: **Construction, visualisation, and clustering of**  
904 **transcription networks from microarray expression data.** *PLoS Comput Biol*  
905 2007, **3**:2032-2042.
- 906 82. Theocharidis A, van Dongen S, Enright AJ, Freeman TC: **Network visualization and**  
907 **analysis of gene expression data using BioLayout Express(3D).** *Nat Protoc* 2009,  
908 **4**:1535-1550.
- 909 83. Bickhart DM, Rosen BD, Koren S, Sayre BL, Hastie AR, Chan S, Lee J, Lam ET,  
910 Liachko I, Sullivan ST, et al: **Single-molecule sequencing and chromatin**  
911 **conformation capture enable de novo reference assembly of the domestic goat**  
912 **genome.** *Nat Genet* 2017, **49**:643-650.
- 913 84. Slater GSC, Birney E: **Automated generation of heuristics for biological sequence**  
914 **comparison.** *BMC Bioinformatics* 2005, **6**:31.
- 915 85. Haas BJ, Salzberg SL, Zhu W, Pertea M, Allen JE, Orvis J, White O, Buell CR,  
916 Wortman JR: **Automated eukaryotic gene structure annotation using**  
917 **EvidenceModeler and the Program to Assemble Spliced Alignments.** *Genome*  
918 *Biol* 2008, **9**:R7.

- 919 86. Fickett JW: **Recognition of protein coding regions in DNA sequences.** *Nucleic*  
920 *Acids Research* 1982, **10**:5303-5318.
- 921 87. Fickett JW, Tung C-S: **Assessment of protein coding measures.** *Nucleic Acids*  
922 *Research* 1992, **20**:6441-6450.
- 923 88. Suzek BE, Huang H, McGarvey P, Mazumder R, Wu CH: **UniRef: comprehensive**  
924 **and non-redundant UniProt reference clusters.** *Bioinformatics* 2007, **23**:1282-  
925 1288.
- 926 89. Suzek BE, Wang Y, Huang H, McGarvey PB, Wu CH: **UniRef clusters: a**  
927 **comprehensive and scalable alternative for improving sequence similarity**  
928 **searches.** *Bioinformatics* 2015, **31**:926-932.
- 929 90. Weikard R, Hadlich F, Kuehn C: **Identification of novel transcripts and noncoding**  
930 **RNAs in bovine skin by deep next generation sequencing.** *BMC Genomics* 2013,  
931 **14**:789.
- 932 91. Sing T, Sander O, Beerenwinkel N, Lengauer T: **ROCR: visualizing classifier**  
933 **performance in R.** *Bioinformatics* 2005, **21**:3940-3941.
- 934 92. Kinsella RJ, Kahari A, Haider S, Zamora J, Proctor G, Spudich G, Almeida-King J,  
935 Staines D, Derwent P, Kerhornou A, et al: **Ensembl BioMart: a hub for data**  
936 **retrieval across taxonomic space.** *Database (Oxford)* 2011, **2011**:bar030.
- 937 93. Ma L, Bajic VB, Zhang Z: **On the classification of long non-coding RNAs.** *RNA*  
938 *Biology* 2013, **10**:924-933.
- 939 94. Rice P, Longden I, Bleasby A: **EMBOSS: the European Molecular Biology Open**  
940 **Software Suite.** *Trends Genet* 2000, **16**:276-277.
- 941 95. Takahashi H, Kato S, Murata M, Carninci P: **CAGE (cap analysis of gene**  
942 **expression): a protocol for the detection of promoter and transcriptional**  
943 **networks.** *Methods Mol Biol* 2012, **786**:181-200.
- 944 96. Sun L, Luo H, Bu D, Zhao G, Yu K, Zhang C, Liu Y, Chen R, Zhao Y: **Utilizing**  
945 **sequence intrinsic composition to classify protein-coding and long non-coding**  
946 **transcripts.** *Nucleic Acids Research* 2013, **41**:e166-e166.
- 947 97. Uhlen M, Oksvold P, Fagerberg L, Lundberg E, Jonasson K, Forsberg M, Zwahlen M,  
948 Kampf C, Wester K, Hober S, et al: **Towards a knowledge-based Human Protein**  
949 **Atlas.** *Nat Biotechnol* 2010, **28**:1248-1250.
- 950 98. Bush SJ, Castillo-Morales A, Tovar-Corona JM, Chen L, Kover PX, Urrutia AO:  
951 **Presence–Absence Variation in *A. thaliana* Is Primarily Associated with**  
952 **Genomic Signatures Consistent with Relaxed Selective Constraints.** *Molecular*  
953 *Biology and Evolution* 2014, **31**:59-69.

954

955

956 **Figures**

957

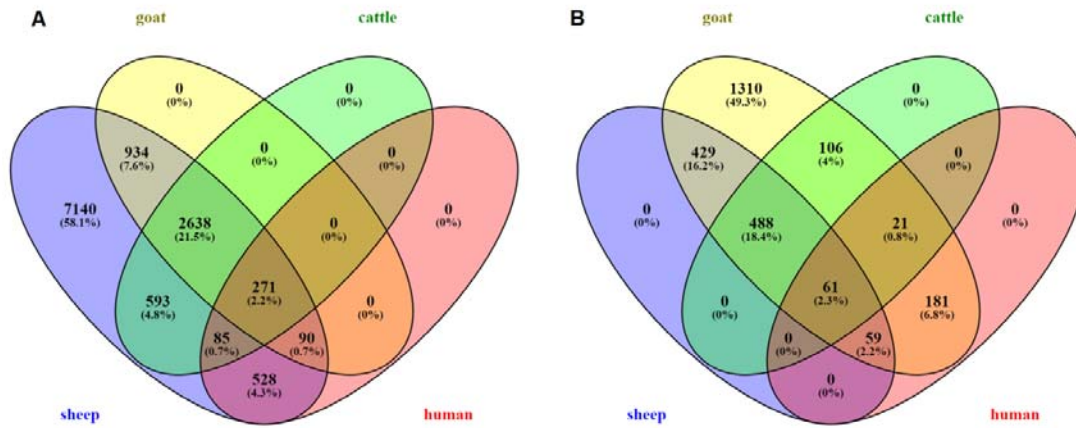

958

959 **Figure 1.** Minimal overlap of lncRNAs at the sequence level. Venn diagrams show the  
960 number of sheep (A) or goat (B) lncRNAs that can be aligned – with an alignment of any  
961 length or quality – to either shortlist of goat (A) or sheep (B) lncRNAs, and to sets of cattle  
962 and human lncRNAs from previous studies. The majority (58% of sheep lncRNAs, and 49%  
963 of goat lncRNAs) have no associated alignment. Alignments are detailed in Tables S9 (sheep)  
964 and S10 (goat).

965

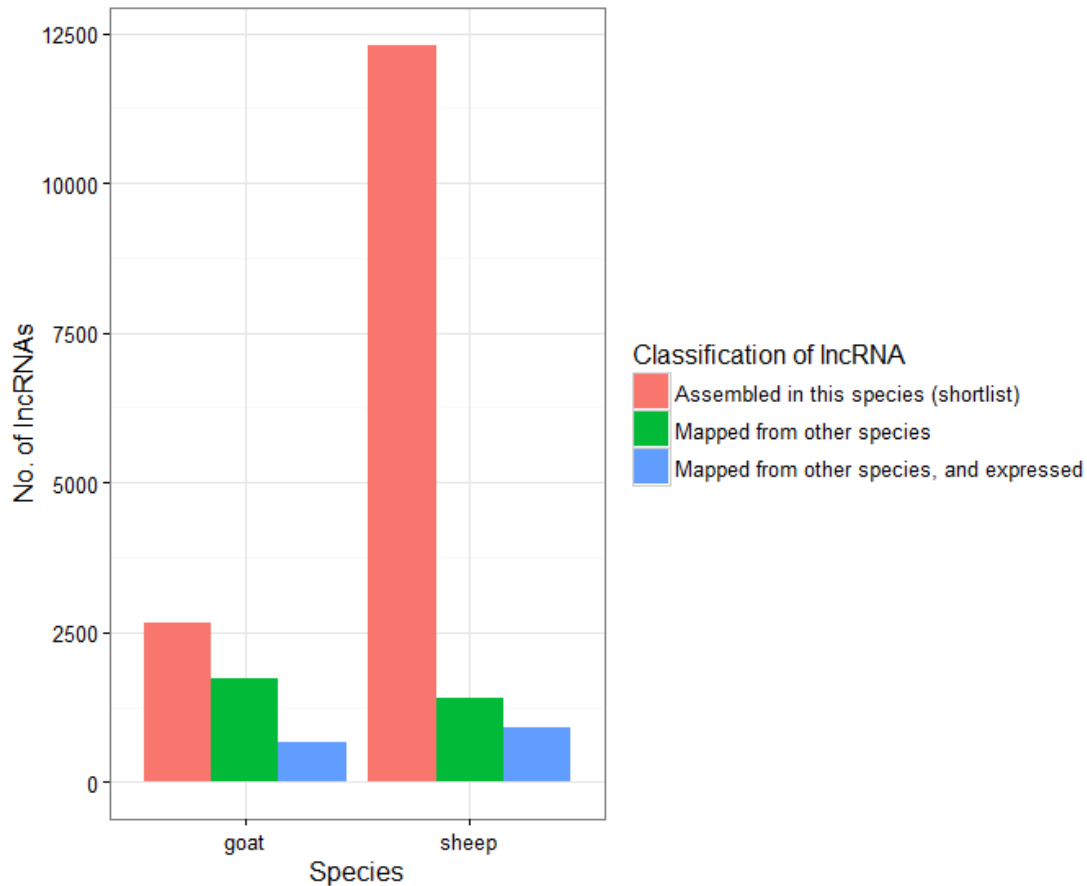

966

967 **Figure 2.** The stochastic detection and assembly of lncRNAs by RNA-seq libraries – a  
968 consequence of limitations in sequencing breadth and depth – suggests that for a given  
969 species, only a subset of the total lncRNRA transcriptome is likely to be captured.  
970 Nevertheless, the number of candidate lncRNAs for that species can be increased if directly  
971 mapping, to a positionally conserved region of the genome, the lncRNAs from either a related  
972 (sheep, goat, cattle) or more distant (human) species. Many of these mapped lncRNAs (which  
973 could not be completely reconstructed with the RNA-seq libraries of that species) are  
974 nevertheless detectably expressed.

975

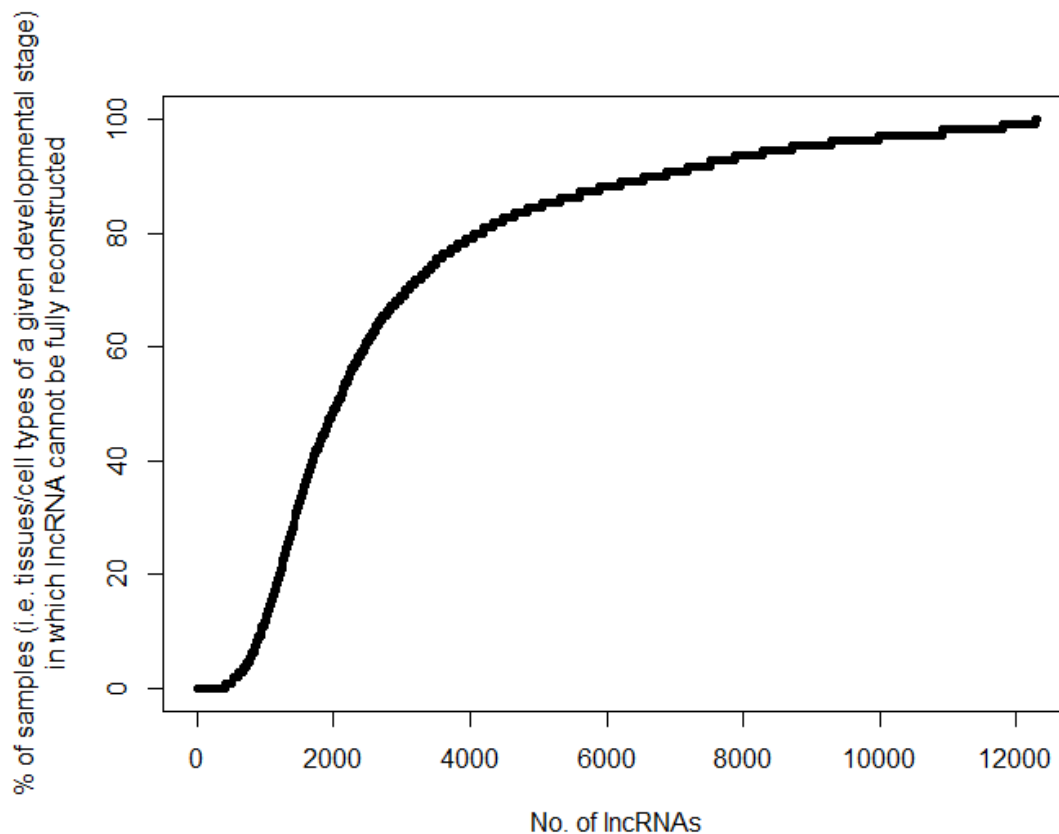

976

977 **Figure 3.** Proportion of samples in the sheep expression atlas for which a candidate lncRNA  
978 (n = 12,296) cannot be fully reconstructed. The atlas comprises 429 RNA-seq libraries,  
979 representing 110 distinct samples; that is, each sample is a tissue/cell type at a given  
980 developmental stage, with up to 6 replicates per sample. 22 candidate lncRNAs cannot be  
981 reconstructed in any given sample (i.e., the proportion of samples is 100%). These lncRNAs  
982 could only be assembled after pooling data from multiple samples. Data for this figure is  
983 given in Table S22.

984

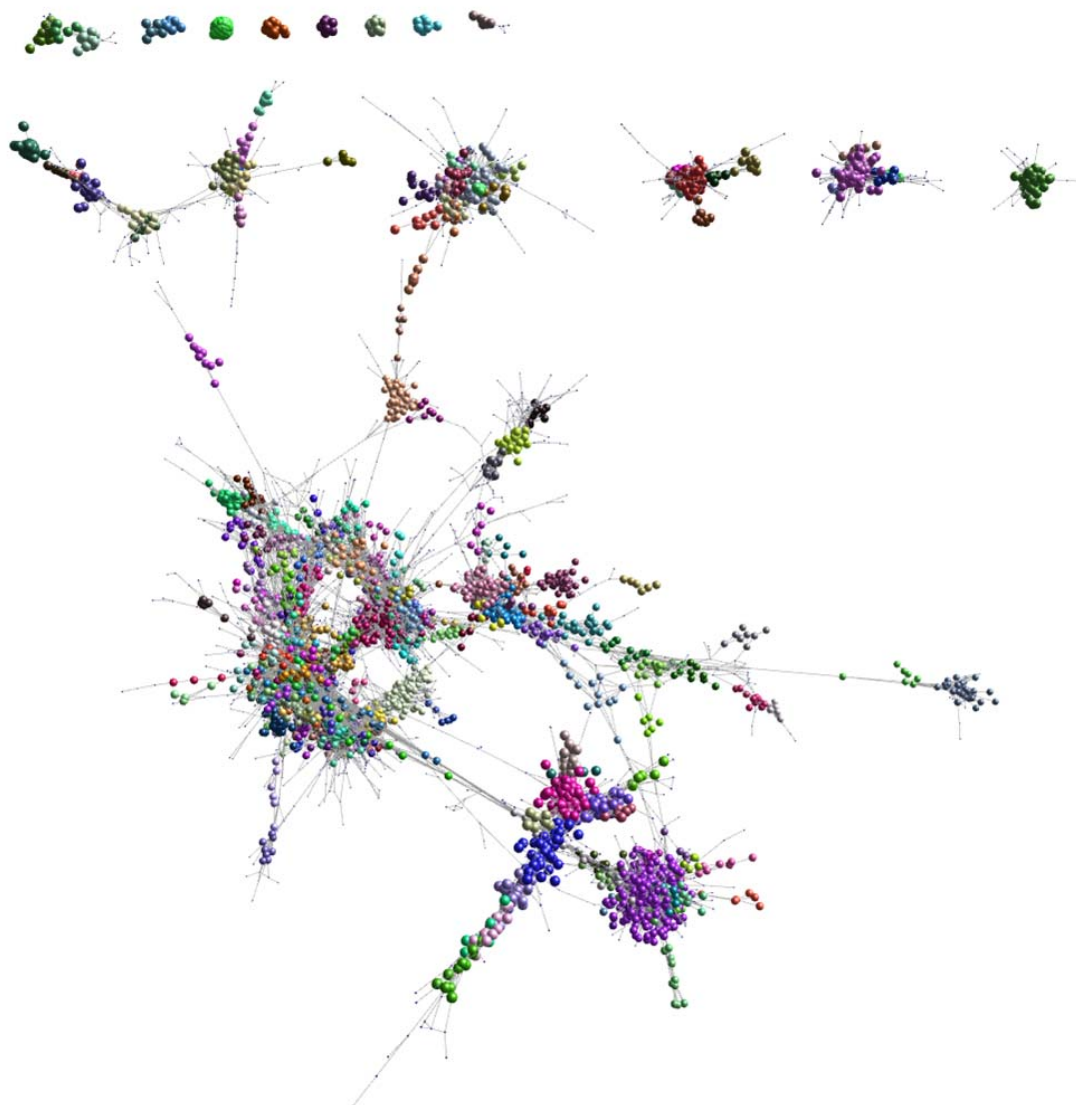

985

986 **Figure 4.** 3D visualisation of a gene-to-gene correlation graph. Each node (sphere) represents  
987 a gene. Nodes are connected by edges (lines) that represent Pearson's correlations between  
988 the two sets of expression level estimates, at a threshold greater than or equal to 0.95. The  
989 graph comprises 11,841 nodes and 2,214,099 edges. Genes cluster together according to the  
990 similarity of their expression profiles (i.e. their degree of co-expression), with clusters  
991 (coloured sets of nodes) determined using the MCL algorithm. Expression level estimates for  
992 the lncRNAs in this graph are given in Table S19. The genes comprising each co-expression



993 cluster are given in Table S23. Those lncRNAs co-regulated with protein-coding genes will  
994 be found within the same co-expression cluster.

995

996 **Supplementary Material**

997

998 **Dataset S1.** 63 sequence assemblies (as GTFs): all possible combinations when merging 6  
999 different sets of RNA-seq reads (available via the University of Edinburgh DataShare portal;  
1000 <http://dx.doi.org/10.7488/ds/2284>).

1001

1002 **Table S1.** Candidate sheep lncRNAs: a shortlist of novel gene models (plus independently  
1003 confirmed known gene models) assessed for coding potential using CPC, CPAT, PLEK,  
1004 blastp vs. Swiss-Prot, and HMMER vs. Pfam.

1005

1006 **Table S2.** Candidate goat lncRNAs: a shortlist of novel gene models assessed for coding  
1007 potential using CPC, CPAT, PLEK, blastp vs. Swiss-Prot, and HMMER vs. Pfam.

1008

1009 **Table S3.** Sheep gene models considered non-coding by either CPC, CPAT or PLEK but  
1010 showing sequence homology to either a known protein (in Swiss-Prot) or protein domain (in  
1011 Pfam-A).

1012

1013 **Table S4.** Goat gene models considered non-coding by either CPC, CPAT or PLEK but  
1014 showing sequence homology to either a known protein (in Swiss-Prot) or protein domain (in  
1015 Pfam-A).

1016

1017 **Table S5.** Number of novel sheep lncRNA gene models identified per chromosome.

1018

1019 **Table S6.** Number of novel goat lncRNA gene models identified per chromosome.

1020

1021 **Table S7.** Number of novel sheep lncRNA gene models identified, by category.

1022

1023 **Table S8.** Number of novel goat lncRNA gene models identified, by category.

1024

1025 **Table S9.** Alignments of novel sheep lncRNA gene models to goat, cattle and human

1026 lncRNAs.

1027

1028 **Table S10.** Alignments of novel goat lncRNA gene models to sheep, cattle and human

1029 lncRNAs.

1030

1031 **Table S11.** Presence of intergenic lncRNAs both in sheep and cattle, in regions of conserved

1032 synteny.

1033

1034 **Table S12.** Presence of intergenic lncRNAs both in sheep and goat, in regions of conserved

1035 synteny.

1036

1037 **Table S13.** Presence of intergenic lncRNAs both in cattle and goat, in regions of conserved

1038 synteny.

1039

1040 **Table S14.** Presence of intergenic lncRNAs both in sheep and human, in regions of

1041 conserved synteny.

1042

1043 **Table S15.** Presence of intergenic lncRNAs both in goat and human, in regions of conserved  
1044 synteny.

1045

1046 **Table S16.** Presence of intergenic lncRNAs both in cattle and human, in regions of conserved  
1047 synteny.

1048

1049 **Table S17.** High-confidence lncRNA pairs, those conserved across species both sequentially  
1050 and positionally.

1051

1052 **Table S18.** lncRNAs inferred in one species by the genomic alignment of a transcript  
1053 assembled with the RNA-seq libraries from a related species.

1054

1055 **Table S19.** Expression level estimates for 13,047 novel sheep lncRNAs, as transcripts per  
1056 million (TPM), assessed using 71 adult RNA-seq libraries (11 tissues plus one cell type in  
1057 two different conditions, each sequenced in 6 individuals).

1058

1059 **Table S20.** Expression level estimates for 4392 novel goat lncRNAs, as transcripts per  
1060 million (TPM), assessed using 54 RNA-seq libraries (20 tissues plus one cell type in two  
1061 different conditions, each sequenced in 4 individuals).

1062

1063 **Table S21.** Reproducibility of sheep lncRNA gene models when merging all combinations of  
1064 data from 6 adults (3 female, 3 male), each individual having sequenced a common set of  
1065 RNA-seq libraries (comprising 31 tissues/cell types).

1066

1067 **Table S22.** Number of sheep expression atlas RNA-seq libraries (out of 429 in total) in which  
1068 a candidate lncRNA gene model cannot be fully reconstructed.

1069

1070 **Table S23.** Genes within each co-expression cluster, after network analysis of the sheep  
1071 RNA-seq libraries.

1072

1073 **Table S24.** No. of lncRNAs co-expressed with protein-coding genes.

1074

1075 **Table S25.** Distance between lncRNAs and protein-coding genes within the same co-  
1076 expression cluster, on the same chromosome.

1077

1078 **Table S26.** Correlation between the expression profile of sheep lncRNAs and their nearest  
1079 protein-coding genes, both 5' and 3'.

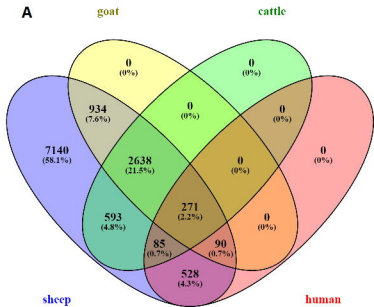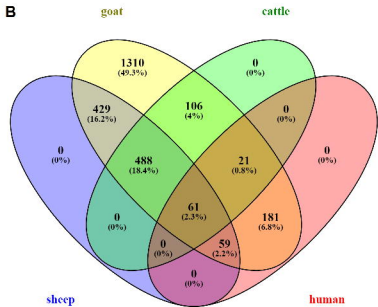

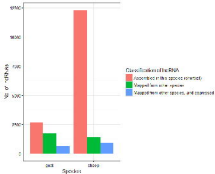

Example 1: Simulate 300 days of a pig-breeding operation using  
in which  $\text{P}(\text{DFA} = \text{male}) = 0.5$ ,  $\text{P}(\text{DFA} = \text{female}) = 0.5$ .

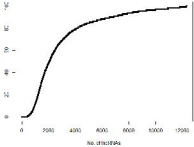

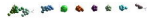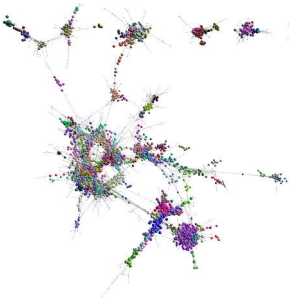

Source: https://www.biorxiv.org/content/10.1101/253997v1.full.pdf
